# Supplementary material for: Comparative and evolutionary analysis of the reptilian hedgehog gene family (Shh, Dhh, and Ihh)
Source: PeerJ. 2019 Aug 30;7:e7613. doi: 10.7717/peerj.7613 (PMC6718155; doi:10.7717/peerj.7613)
Supplement: Supplemental Information 4 [file peerj-07-7613-s004.xlsx]

## Sheet: Sheet1
Hedgehog genes sequences information in reptiles.
Accession No.	Scientific Name	Taxon	Hedgehog gene	Seq
XM_026718320.1	Pseudonaja_textilis	Squamata	Shh	ATGCTGCTCCTGAGAAGAACTGGGCTCCTCCCGCTTTGCCTAGGCGCGCTTTTCCTCTCCGCCGGGCTGGCTTGCGGGCCGGGCCGGGGTTTCGGCAAGAGGAGACACCCGAAGAAACTGACCCCTTTAGCCTACAAGCAGTTCATCCCCAACGTGGCCGAGAAGACGCTGGGCGCCAGCGGCAGATACGAGGGCAAGATCACTCGGAACTCGGAGCGCTTTAAAGAGCTGACCCCCAATTATAATCCGGACATTATTTTTAAGGACGAGGAGAACACGGGAGCCGACCGGCTGATGACCCAGCGCTGCAAGGACAAGCTGAACGCTTTGGCCATCTCGGTCATGAACCAGTGGCCGGGCGTCAAGCTTCGCGTCACGGAGGGCTGGGACGAGGACGGC…
XM_026680924.1	Notechis_scutatus	Squamata	Shh	ATGCTGCTCCTGAGAAGAACTGGGCTCCTCCCGCTCTGCCTAGGCGCGCTTTTCCTCTCCGCCGGGCTAGCTTGCGGGCCGGGCCGGGGTTTCGGCAAGAGGAGACACCCGAAGAAACTGACCCCTTTAGCCTACAAGCAGTTCATCCCCAACGTGGCCGAGAAGACGCTGGGCGCCAGCGGCAGATACGAGGGCAAGATCACTCGGAACTCGGAGCGCTTTAAAGAGCTGACCCCCAATTATAATCCGGACATTATTTTTAAGGACGAGGAGAACACGGGAGCCGACCGGCTGATGACCCAGCGCTGCAAGGACAAGCTGAACGCTTTGGCCATCTCGGTCATGAACCAGTGGCCGGGCGTCAAGCTACGCGTCACGGAGGGCTGGGACGAGGACGGC…
XM_024209770.2	Terrapene_mexicana	Testudines	Shh	ATGGACGAAATGCGGCTGTTGACAAGAATTCTGTTGGTGGGGTTCATCTGCGTTCTTTTGGTCTCCTCTGGGCTGACTTGTGGACCAGGCAGGGGTATTGGAAAAAGGAGACACCCCAAAAAACTGACCCCTTTAGCCTATAAGCAGTTTATTCCCAATGTGGCAGAGAAGACCCTAGGGGCCAGTGGAAGATATGAAGGGAAGATCTCAAGAAACTCCGAGAGATTTAAAGAACTAACCCCAAATTACAACCCTGACATTATTTTTAAGGATGAAGAGAACACTGGAGCTGACAGACTGATGACTCAGAGATGCAAAGACAAGCTGAACGCCCTGGCTATCTCGGTGATGAACCAGTGGCCCGGAGTGAAGCTGAGGGTGACCGAGGGATGGGATGAA…
XM_020779724.1	Pogona_vitticeps	Squamata	Shh	ATGCTGCCGTTGAGAAGGCTTGGGCTCCTGCTGGCCTCGCTGGGCTTCCTCTTGTCCCTCCTCTCGGCCGGGCTGGCTTGCGGACCGGGACGGGGCTTCGGCAAGCGGCGGCACCCGAAGAAGCTCACCCCGCTCGCCTACAAGCAGTTCATCCCCAACGTGGCCGAGAAGACCTTGGGCGCCAGCGGCCGCTACGAAGGCAAGATCAGCCGGACCTCGGAGCGGTTTAAAGAGCTCACCCCCAACTACAACCCCGACATCATCTTTAAGGATGAAGAGAACACAGGGGCGGACCGGCTGATGACTGAGCGCTGCAAGGACAAGCTGAACGCCTTGGCCATCTCGGTGATGAACCAGTGGCCGGGGGTCAAGCTCCGCGTCACCGAGGGCTGGGACGAG…
XM_019508154.1	Gavialis_gangeticus	Crocodylia	Shh	ATGGACGAAATGCTGCTGTTGACAAGAATTCTCTTGGTGGGCTTCATCTGCGCTCTTTTGGTCTCCTCGGGGCTGCCTTGTGGACCGGGCAGGGGGATTGGAAAAAGGAGACACCCCAAAAAACTGACCCCTTTAGCCTATAAGCAGTATATCCCCAATGTGGCAGAGAAGACCCTAGGGGCCAGTGGAAGATATGAAGGGAAGATCATAAGAAACTCCGAGAGATTTAAAGAACTAACCCCAAATTACAACCCTGACATTATTTTTAAGGATGAAGAGAACACTGGAGCTGACAGACTGATGACTCAGCGCTGCAAGGACAAGCTGAACGCCCTGGCCATCTCGGTGATGAACCAGTGGCCCGGCGTGAAGCTGCGGGTGACCGAGGGCTGGGACGAG…
XM_015832549.1	Protobothrops_mucrosquamatus	Squamata	Shh	ATGCTGCTCCTCCGAAGAACTGGGCTCCTCCCGCTCTGCCTAGGCGCGCTTTTCCTCTCCGCCGGGCTGGCTTGCGGGCCGGGCCGGGGTTTCGGCAAGAGGAGGCACCCGAAGAAATTGACCCCTTTAGCCTACAAGCAGTTCATCCCCAACGTGGCCGAGAAGACGCTGGGCGCCAGCGGCAGATACGAGGGCAAGATCAGCCGGAACTCGGAGCGCTTTAAAGAGCTGACCCCCAATTATAATCCGGACATTATTTTTAAGGACGAGGAGAACACGGGAGCCGACCGGCTGATGACCCAGCGCTGCAAGGACAAGCTGAACGCGCTGGCCATCTCCGTCATGAACCAGTGGCCGGGCGTCAAGCTGCGCGTCACGGAGGGCTGGGACGAGGACGGC…
XM_015418960.1	Gekko_japonicus	Squamata	Shh	ATGCTGCTCTCGAGGAGGCTGGTGCTGCCGGGGGTCTTCTTCGGCGCCCTCTTCCTCTCCTCCGGGCTGGCCTGCGGACCGGGCCGGGGCTTCGGCAAGCGGCGGCACCCCAAGAAGCTGACCCCGCTGGCCTACAAGCAGTTCATCCCCAACGTGGCCGAGAAGACGCTGGGCGCCAGCGGGCGCTACGAGGGCAAGATCACCCGCAGCTCGGAGCGCTTCAAGGAGCTGACCCCCAACTACAACCCGGACATTATCTTCAAGGATGAGGAGAACACCGGGGCCGACCGGCTGATGACCCAGCGCTGCAAAGACAAGCTCAACGCCCTGGCCATCTCGGTGATGAACCAGTGGCCGGGAGTGAAGCTGCGGGTGACCGAGGGCTGGGACGAGGACGGC…
XM_019530533.1	Crocodylus_porosus	Crocodylia	Shh	ATGGACGAAATGCTGCTGTTGACAAGAATTCTCTTGGTGGGCTTCATCTGCGCTCTTTTGGTCTCCTCGGGGCTGCCTTGTGGACCGGGCAGGGGGATTGGAAAAAGGAGACACCCCAAAAAACTGACCCCTTTAGCCTATAAGCAGTATATCCCCAATGTGGCAGAGAAGACCCTAGGGGCCAGTGGAAGATATGAAGGGAAGATCATAAGAAACTCCGAGAGATTTAAAGAACTAACCCCAAATTACAACCCTGACATTATTTTTAAGGATGAAGAGAACACTGGAGCTGACAGACTGATGACTCAGCGCTGCAAGGACAAGCTGAACGCCCTGGCGATCTCGGTGATGAACCAGTGGCCCGGCGTGAAGCTGCGGGTGACCGAGGGCTGGGACGAG…
XM_014067506.1	Thamnophis_sirtalis	Squamata	Shh	ATGCTGCTTCTGAGAAGAACTGGGCTCCTCCCGCTGTGCCTAGGCGCGCTTTTCCTCTCCGCCGGGCTGGCTTGCGGGCCGGGCCGGGGTTTCGGCAAGAGGAGGCACCCGAAGAAACTGACCCCTTTAGCCTACAAGCAGTTCATCCCCAACGTGGCCGAGAAGACGCTGGGCGCCAGCGGCAGATACGAGGGGAAGATCACTCGGAACTCGGAGCGCTTTAAAGAGCTGACCCCCAATTATAATCCGGACATTATTTTTAAGGACGAGGAGAACACGGGAGCCGACCGGCTGATGACCCAGCGATGCAAGGACAAGCTGAACGCGCTGGCCATCTCCGTCATGAACCAGTGGCCGGGCGTCAAGCTGCGCGTCACGGAGGGCTGGGACGAGGACGGC…
XM_007433194.2	Python_bivittatus	Squamata	Shh	ATGCTGCTCCGGAGAAGATCTGGGCTCCTCCCGCTCTGCCTAGGCGCGCTTTTCCTCTCCGCCGGGCTGGCGTGCGGGCCGGGCCGGGGCTTCGGCAAGAGGCGGCACCCGAAGAAGCTGACCCCTTTAGCCTACAAGCAGTTCATCCCCAACGTGGCCGAGAAGACGCTGGGCGCCAGCGGCAGATACGAGGGCAAGATCAGCCGGAACTCGGAGCGCTTTAAAGAGCTGACCCCCAATTATAATCCGGACATTATTTTTAAGGACGAGGAGAACACGGGAGCCGACCGGCTGATGACCCAGCGCTGCAAGGACAAGCTGAACGCGCTGGCCATCTCCGTCATGAACCAGTGGCCCGGCGTCAAGCTGCGCGTCACCGAGGGCTGGGACGAGGACGGC…
XM_006260175.3	Alligator_mississippiensis	Crocodylia	Shh	ATGGACGAAATGCTGCTGTTGACAAGAATTCTCTTGGTGGGCTTCATCTGCGCTCTTTTGGTCTCCTCGGGGCTGCCTTGTGGACCGGGCAGGGGGATTGGAAAAAGGAGACACCCCAAAAAACTGACCCCTTTAGCCTATAAGCAGTATATCCCCAATGTGGCAGAGAAGACCCTAGGGGCCAGTGGAAGATATGAAGGGAAGATCATAAGAAACTCCGAGAGATTTAAAGAACTAACCCCAAATTACAACCCTGACATTATTTTTAAGGATGAAGAGAACACTGGAGCTGACAGACTGATGACTCAGCGGTGCAAGGACAAGCTGAACGCCCTGGCGATCTCGGTGATGAACCAGTGGCCCGGGGTGAAGCTGCGGGTGACCGAGGGCTGGGACGAG…
XM_006018542.3	Alligator_sinensis	Crocodylia	Shh	ATGGACGAAATGCTGCTGTTGACAAGAATTCTCTTGGTGGGCTTCATCTGCGCTCTTTTGGTCTCCTCGGGGCTGCCTTGTGGACCGGGCAGGGGGATTGGAAAAAGGAGACACCCCAAAAAACTGACCCCTTTAGCCTATAAGCAGTATATCCCCAATGTGGCAGAGAAGACCCTAGGGGCCAGTGGAAGATATGAAGGGAAGATCATAAGAAACTCCGAGAGATTTAAAGAACTAACCCCAAATTACAACCCTGACATTATTTTTAAGGATGAAGAGAACACTGGAGCTGACAGACTGATGACTCAGCGGTGCAAGGACAAGCTGAACGCCCTGGCGATCTCGGTGATGAACCAGTGGCCCGGGGTGAAGCTGCGGGTGACCGAGGGCTGGGACGAG…
XM_003221928.3	Anolis_carolinensis	Squamata	Shh	ATGCGTGTGCCGTGGGGCGCGGGGCGGTGGTGTCGGGCTCCGGCGCTGCTGCTCCTGCTGCTCCTCTGCCCCTCCAGCCTGGCGTGCGGGCCCGGGAGGGGCTTCGGGAAGCGGCGGCACCCCAAGAAGCTCACGCCCTTGGCCTACAAGCAGTTCATCCCCAACGTGGCCGAGAAGACGCTGGGCGCCTCCGGGCGCTACGAGGGCAAGATCAGCCGCAGCTCGGAGCGCTTCAAGGAGCTCACCCCCAACTACAACCCGGACATCATCTTCAAGGATGAGGAGAACACCGGCGCGGACCGGCTCATGACCCAGCGTTGCAAGGACAAGCTAAATGCCTTGGCCATCTCAGTGATGAACCAGTGGCCCGGGGTGAAGCTGCGTGTGACCGAGGGCTGG…
XM_005297202.2	Chrysemys_picta	Testudines	Shh	ATGGACGAAATGCTGCTGTTGACAAGAATTCTGTTGGTGGGCTTCATCTGCGTTCTTTTGGTCTCCTCTGGGCTGACTTGTGGACCAGGCAGGGGTATTGGAAAAAGGAGACACCCCAAAAAACTGACCCCTTTAGCCTATAAGCAGTTTATTCCCAATGTGGCAGAGAAGACCCTAGGGGCCAGTGGAAGATATGAAGGGAAGATCTCAAGAAACTCCGAGAGATTTAAAGAACTAACCCCAAATTACAACCCTGACATTATTTTTAAGGATGAAGAGAACACTGGAGCTGACAGACTGATGACTCAGAGATGCAAAGACAAGCTGAACGCCCTGGCTATCTCGGTGATGAACCAGTGGCCCGGAGTGAAGCTGAGGGTGACCGAGGGATGGGATGAA…
PKMU01001700.1	Chelonoidis_abingdonii	Testudines	Shh	ATGGACGAAATGCTGCTGTTGACAAGAATTCTGTTGGTGGGCTTCATCAGCGTTCTTTTGGTCTCCTCTGGGCTGACTTGTGGACCAGGCAGGGGTATTGGAAAAAGGAGACACCCCAAAAAACTGACCCCTTTAGCCTATAAGCAGTTTATTCCCAATGTGGCAGAGAAGACCCTAGGGGCCAGTGGAAGATATGAAGGGAAGATCTCAAGAAACTCCGAGAGATTTAAAGAACTAACCCCAAATTACAACCCTGACATTATTTTTAAGGATGAAGAGAACACTGGAGCTGACAGACTGATGACTCAGAGATGCAAAGACAAGCTGAACGCCCTGGCGATCTCAGTGATGAACCAGTGGCCCGGCGTGAAGCTGAGGGTGACCGAGGGGTGGGATGAA…
PDHV01001528.1	Crotalus_viridis	Squamata	Shh	ATGCTACTCCTCCGAAGAACTGGGCTCCTCCCGCTCTGCCTAGGCGCGCTTTTCCTCTCCGCCGGGCTGGCTTGCGGGCCGGGCCGGGGTTTCGGCAAGAGGAGGCACCCGAAGAAATTGACCCCTTTAGCCTACAAGCAGTTCATCCCCAACGTGGCCGAGAAGACGCTGGGCGCCAGCGGCAGATACGAGGGCAAGATCAGCCGGAACTCGGAGCGCTTTAAAGAGCTGACCCCCAATTATAATCCGGACATTATTTTTAAGGACGAGGAGAACACGGGAGCCGACCGGCTGATGACCCAGCGCTGCAAGGACAAGCTGAACGCGCTGGCCATCTCCGTCATGAACCAGTGGCCGGGCGTCAAGCTGCGCGTCACGGAGGGCTGGGATGAGGACGGC…
ML123154.1	Cuora_mccordi	Testudines	Shh	ATGGACGAAATGCTGCTGTTGACAAGAATTCTGTTGGTGGGCTTCATCTGCGTTCTTTTGGTCTCCTCTGGGCTGACTTGTGGACCAGGCAGGGGTATTGGAAAAAGGAGACACCCCAAAAAACTGACCCCTTTAGCCTATAAGCAGTTTATTCCCAATGTGGCAGAGAAGACCCTAGGGGCCAGTGGAAGATATGAAGGGAAGATCTCAAGAAACTCCGAGAGATTTAAAGAACTAACCCCAAATTACAACCCTGACATTATTTTTAAGGATGAAGAGAACACTGGAGCTGACAGACTGATGACTCAGAGATGCAAAGACAAGCTGAACGCCCTGGCGATCTCGGTGATGAACCAGTGGCCCGGAGTGAAGCTGAGGGTGACCGAGGGCTGGGATGAA…
PPEB01004611.1	Gopherus_agassizii	Testudines	Shh	ATGGACGAAATGCTGCTGTTGACAAGAATTCTGTTGGTGGGCTTCATCTGCGTTCTTTTGGTCTCCTCTGGGCTGACTTGTGGACCAGGCAGGGGTATTGGAAAAAGGAGACACCCCAAAAAACTGACCCCTTTAGCCTATAAGCAGTTTATTCCCAATGTGGCAGAGAAGACCCTAGGGGCCAGTGGAAGATATGAAGGGAAGATCTCAAGAAACTCCGAGAGATTTAAAGAACTAACCCCAAATTACAACCCTGACATTATTTTTAAGGATGAAGAGAACACTGGAGCTGACAGACTGATGACTCAGAGATGCAAAGACAAGCTGAACGCCCTGGCGATCTCGGTGATGAACCAGTGGCCTGGCGTGAAGCTGAGGGTGACCGAGGGATGGGATGAA…
OFHV01000041.1	Lacerta_bilineata	Squamata	Shh	ATGCTGCTCTTGCGGAGAATTGGTCTCCTGCTGGTCTTCGTGGGCGCTTTGCTGCTCTCCTGCGGGCTGGCTTGCGGACCGGGCAGGGGCTTCGGCAAGAGGCGGCACCCGAAGAAGCTGACCCCTTTAGCCTACAAGCAGTTCATTCCCAACGTGGCAGAGAAGACGCTGGGCGCCAGTGGAAGGTACGAAGGCAAGATCAGCCGCAACTCGGAGCGCTTTAAAGAGCTCACCCCCAATTACAACCCTGACATTATTTTTAAGGATGAAGAGAACACGGGAGCCGACAGGCTGATGACTCAGCGCTGCAAGGACAAGCTGAACGCCTTGGCGATCTCGGTGATGAACCAGTGGCCTGGCGTGAAGCTGCGCGTGACCGAGGGCTGGGACGAGGACGGC…
OFHU01004110.1	Lacerta_viridis	Squamata	Shh	ATGCTGCTCTTGCGGAGAATTGGTCTCCTGCTGGTCTTCGTGGGCGCTTTGCTGCTCTCCTGCGGGCTGGCTTGCGGACCGGGCAGGGGCTTCGGCAAGAGGCGGCACCCGAAGAAGCTGACCCCTTTAGCCTACAAGCAGTTCATTCCCAACGTGGCAGAGAAGACGCTGGGCGCCAGTGGAAGGTACGAAGGCAAGATCAGCCGCAACTCGGAGCGCTTTAAAGAGCTCACCCCCAATTACAACCCTGACATTATTTTTAAGGATGAAGAGAACACGGGAGCCGACAGGCTGATGACACAGCGCTGCAAGGACAAGCTGAACGCCTTGGCGATCTCGGTGATGAACCAGTGGCCTGGCGTGAAGCTGCGCGTGACCGAGGGCTGGGACGAGGACGGC…
MDXI01016939.1	Malaclemys_terrapin	Testudines	Shh	ATGGACGAAATGCTGCTGTTGACAAGAATTCTGTTGGTGGGCTTCATCTGCGTTCTTTTGGTCTCCTCTGGGCTGACTTGTGGACCAGGCAGGGGTATTGGAAAAAGGAGACACCCCAAAAAACTGACCCCTTTAGCCTATAAGCAGTTTATTCCCAATGTGGCAGAGAAGACCCTAGGGGCCAGTGGAAGATATGAAGGGAAGATCTCAAGAAACTCCGAGAGATTTAAAGAACTAACCCCAAATTACAACCCTGACATTATTTTTAAGGATGAAGAGAACACTGGAGCTGACAGACTGATGACTCAGAGATGCAAAGACAAGCTGAACGCCCTGGCTATCTCGGTGATGAACCAGTGGCCCGGAGTGAAGCTGAGGGTGACCGAGGGATGGGATGAA…
JTLQ01299612.1	Pantherophis_guttatus	Squamata	Shh	ATGTTGCTCCTGAGAAGAACTGGGCTCCTCCCGCTCTGCCTAGGCGCGCTTTTCCTCTCCGCCGGGCTGGCTTGCGGGCCGGGCCGGGGTTTCGGCAAGAGGAGGCACCCGAAGAAATTGACCCCTTTAGGCTACAAGCAGTTCATCCCCAACGTGGCCGAGAAGACGCTGGGCGCCAGCGGCAGATACGAGGGCAAGATCACCCGGAACTCGGAGCGCTTTAAAGAGCTGACCCCCAATTATAATCCGGCCATCCCTCTCGCCTACAAGGAGAAGACGGGAGCCAAGGAGCTGACGCCCCAGCGCTGCAAGGACAAGCTGAACGCGCTGGCCATCTCCGTCATGAACCAGTGGCCGGGCGTCAAACTGCGCGTCACGGAGGGCTGGGACGAGGACGGC…
BDOT01028934.1	Paroedura_picta	Squamata	Shh	ATGCTGCTCTCGCGGAGGCTGGCGCTGCCGGGGGTCTTCTTCGGCGCCCTCTTCCTCTCGGCGGGCCTGGCGTGCGGGCCGGGCCGGGGCTTCGGCAAGCGGCGGCACCCCAAGAAGCTGACCCCCCTGGCCTACAAGCAGTTCATCCCCAATGTGGCCGAGAAGACGCTGGGCGCCAGCGGCAGGTACGAGGGCAAGATCAGCCGCAGCTCGGAGCGCTTCAAGGAGCTCACGCCCAACTACAACCCGGACATTATCTTCAAGGACGAGGAGAACACGGGAGCCGACCGGCTGATGACCCAGCGCTGCAAGGACCGGGTCAACACCTTGGCCATTGCAGTGATGAACAAGTGGCCGGGGGTCAGGCTCCGAGTGACAGAAGGCTGGGATGAAGACGGC…
QXTE01000042.1	Platysternon_megacephalum	Testudines	Shh	ATGGACGAAATGCTGCTGTTGACAAGAATTCTGTTGGTGGGCTTCATCTGCGTTCTTTTGGTCTCCTCTGGGCTGACTTGTGGACCAGGCAGGGGTATTGGAAAAAGGAGACACCCCAAAAAACTGACCCCTTTAGCCTATAAGCAGTTTATTCCCAATGTGGCAGAGAAGACCCTAGGGGCCAGTGGAAGATATGAAGGGAAGATCTCAAGAAACTCCGAGAGATTTAAAGAACTAACCCCAAATTACAACCCTGACATTATTTTTAAGGATGAAGAGAACACTGGAGCGGACAGACTGATGACTCAGAGATGCAAAGACAAGCTGAACGCCCTGGCTATCTCGGTGATGAACCAGTGGCCCGGAGTGAAGCTGAGGGTGACCGAGGGATGGGATGAA…
BFFQ01005478.1	Protobothrops_flavoviridis	Squamata	Shh	ATGCTGCTCCTCCGAAGAACTGGGCTCCTCCCGCTCTGCCTAGGCGCGCTTTTCCTCTCCGCCGGGCTGGCTTGCGGGCCGGGCCGGGGTTTCGGCAAGAGGAGGCACCCGAAGAAATTGACCCCTTTAGCCTACAAGCAGTTCATCCCCAACGTGGCCGAGAAGACGCTGGGCGCCAGCGGCAGATACGAGGGCAAGATCAGCCGGAACTCGGAGCGCTTTAAAGAGCTGACCCCCAATTATAATCCGGACATTATTTTTAAGGACGAGGAGAACACGGGAGCCGACCGGCTGATGACCCAGCGCTGCAAGGACAAGCTGAACGCGCTGGCCATCTCCGTCATGAACCAGTGGCCGGGCGTCAAGCTGCGCGTCACGGAGGGCTGGGACGAGGACGGC…
QVOM02000116.1	Salvator_merianae	Squamata	Shh	ATGCTGCTGATGAGAAGAGCTGGGGTGCTCCTGATCTTTTGGGGCGCTCTCTTCCTGTCCTCCGGGCTGGCTTGTGGACCAGGCAGGGGCTTCGGCAAGAGGAGGCACCCGAAAAAGCTGACCCCGCTAGCCTACAAGCAGTTCATCCCCAACGTCGCCGAGAAGACTCTCGGAGCCAGTGGAAGGTACGAAGGCAAGATCAGCCGGAACTCGGAACGGTTTAAAGAGCTCACCCCCAATTACAACCCTGACATTATCTTTAAGGATGAAGAGAACACGGGAGCCGACAGGCTGATGACACAGCGCTGCAAGGACAAACTCAATGCCTTGGCCATCTCCGTGATGAACCAATGGCCAGGTGTGAAGCTCCGCGTGACCGAGGGCTGGGATGAGGATGGG…
AZIM01000247.1	Ophiophagus_hannah	Squamata	Shh	ATGCTGCTCCTGAGAAGAACTGGGCTCCTCCCGCTTTGCCTAGGCGCGCTTTTCCTCTCCGCCGGGCTGGCTTGCGGGGCGGGCCGGGGTTTCGGCAAGAGGAGACACCCGAAGAAACTGACCCCTTTAGCCTACAAGCAGTTCATCCCCAACGTGGCCGAGAAGACGCTGGGCGCCAGCGGCAGATACGAGGGCAAGATCACTCGGAACTCGGAGCGCTTTAAAGAGCTGACCCCCAATTATAATCCGGACATTATTTTTAAGGACGAGGAGAACACGGGAGCCGACCGGCTGATGACCCAGCGCTGCAAGGACAAGCTGAACGCGCTGGCCATCTCGGTCATGAACCAGTGGCCGGGCGTCAAGCTGCGCGTCACGGAGGGCTGGGACGAGGACGGC…
JPMF01003586.1	Crotalus_pyrrhus	Squamata	Shh	ATGCTACTCCTCCGAAGAACTGGGCTCCTCCCGCTCTGCCTAGGCGCGCTTTTCCTCTCCGCCGGGCTGGCTTGCGGGCCGGGCCGGGGTTTCGGCAAGAGGAGGCACCCGAAGAAATTGACCCCTTTAGCCTACAAGCAGTTCATCCCCAACGTGGCCGAGAAGACGCTGGGCGCCAGCGGCAGATACGAGGGCAAGATCAGCCGGAACTCGGAGCGCTTTAAAGAGCTGACCCCCAATTATAATCCGGACATTATTTTTAAGGACGAGGAGAACACGGGAGCCGACCGGCTGATGACCCAGCGCTGCAAGGACAAGCTGAACGCGCTGGCCATCTCCGTCATGAACCAGTGGCCGGGCGTCAAGCTGCGCGTCACGGAGGGCTGGGATGAGGACGGC…
RSAE01444661.1	Hydrophis_cyanocinctus	Squamata	Shh	ATGCTGCTCCTGAGAAGAACTGGGCTCCTCCCGCTCTGCCTAGGCGCGCTTTTCCTCTCCGCCGGGCTGGCTTGCGGGCCGGGCCGGGGTTTCGGCAAGAGGAGACACCCGAAGAAACTGACCCCTTTAGCCTACAAGCAGTTCATCCCCAACGTGGCCGAGAAGACGCTGGGCGCCAGCGGCAGATACGAGGGCAAGATCACTCGGAACTCGGAGCGCTTTAAAGAGCTGACCCCCAATTATAATCCGGACATTATTTTTAAGGACGAGGAGAACACGGGAGCCGACCGGCTGATGACCCAGCGCTGCAAGGACAAGCTGAACGCTTTGGCCATCTCGGTCATGAACCAGTGGCCGGGCGTCAAGCTACGCGTCACGGAGGGCTGGGACGAGGACGGC…
RSAD01099121.1	Hydrophis_hardwickii	Squamata	Shh	ATGCTGCTCCTGAGAAGAACTGGGCTCCTCCCGCTCTGCCTAGGCGCGCTTTTCCTCTCCGCCGGGCTGGCTTGCGGGCCGGGCCGGGGTTTCGGCAAGAGGAGACACCCGAAGAAACTGACCCCTTTAGCCTACAAGCAGTTCATCCCCAACGTGGCCGAGAAGACGCTGGGCGCCAGCGGCAGATACGAGGGCAAGATCACTCGGAACTCGGAGCGCTTTAAAGAGCTGACCCCCAATTATAATCCGGACATTATTTTTAAGGACGAGGAGAACACGGGAGCCGACCGGCTGATGACCCAGCGCTGCAAGGACAAGCTGAACGCTTTGGCCATCTCGGTCATGAACCAGTGGCCGGGCGTCAAGCTACGCGTCACGGAGGGCTGGGACGAGGACGGC…
QLTV01002718.1	Thermophis_baileyi	Squamata	Shh	ATGCTGCTCCTGAGAAGAACTGGGCTCCTCCCGCTCTGCCTAGGCGCGCTTTTCCTCTCCGCCGGGCTGGCTTGCGGGCCGGGCCGGGGTTTCGGCAAGAGGAGGCACCCGAAGAAATTGACCCCTTTAGCCTACAAGCAGTTCATCCCCAACGTGGCCGAGAAGACGCTGGGCGCCAGCGGCAGATACGAGGGCAAGATCACCCGGAACTCGGAGCGCTTTAAAGAGCTGACCCCCAATTATAATCCGGACATTATTTTTAAGGACGAGGAGAACACGGGAGCCGACCGGCTGATGACCCAGCGCTGCAAGGACAAGCTGAACGCGCTGGCCATCTCCGTCATGAACCAGTGGCCGGGCGTCAAGCTGCGCGTCACGGAGGGCTGGGACGAGGACGGC…
scaffold1707	Ophisaurus_gracilis	Squamata	Shh	ATGCTGCTCCGGAGCAGGATTGGGCTCCCGCTAGTCTTCCTGGGCGCCCTGCTCGCGTCCTCCGGGCTGGCTTGCGGGCCGGGCAGGGGCTTCGGCAAGAGGAGGCACCCCAAGAAGCTGACCCCGTTAGCCTACAAGCAGTTCATTCCCAACGTGGCAGAGAAGACCCTGGGCGCCAGCGGCAGGTACGAAGGCAAGATCAGCCGCAACTCGGAGCGCTTTAAAGAGCTCACCCCGAATTACAACCCGGACATTATCTTCAAGGATGAAGAGAACACGGGAGCCGACAGGCTGATGACACAGCGTTGCAAAGACAAGCTGAACGCCTTGGCGATCTCCGTGATGAACCAGTGGCCCGGCGTGAAGCTACGCGTGACCGAGGGCTGGGACGAGGACGGC…
KN620977.1	Vipera_berus	Squamata	Shh	ATGCTGCTCCTCAGAAGAACTGGGCTCCTCCCGCTCTGCCTAGGCGCGCTTTTCCTCTCCGCCGGGCTGGCTTGCGGGCCGGGCCGGGGTTTCGGCAAGAGGAGGCACCCGAAGAAATTGACCCCTTTAGCCTACAAGCAGTTCATCCCCAACGTGGCCGAGAAGACGCTGGGCGCCAGCGGCAGATACGAGGGCAAGATCAGCCGGAACTCGGAGCGCTTTAAAGAGCTGACCCCCAATTATAATCCGGACATTATTTTTAAGGACGAGGAGAACACGGGAGCCGACCGGCTGATGACCCAGCGCTGCAAGGACAAGCTGAACGCGCTGGCCATCTCCGTCATGAACCAGTGGCCGGGCGTCAAGCTGCGCGTCACGGAGGGCTGGGACGAGGACGGC…
XM_026711165.1	Pseudonaja_textilis	Squamata	Dhh	ATGGCTTGGCGCAGGCTTACCCTGGTCAACCTGCTTGGGCTTTGCTTGACCAGCTGCCTCCTGTGCCCTGCTCAGGGCTGTGGCCCAGGCAGGGGGCCGGTGGGACGGAAGCAGTCCAGCCGCAGAAGCCTGGCCCCGCTGCAGTACAAGCAGTTTGTGCCCAATGTGGCGGAACAGACCCTGGGAGCCAGTGGCAAAGCCGAGGGCAAAATCAGCCGCCACTCCGAGCGCTTCAAGGTCTTGGTGCCCAACTACAACCCTGACATCATCTTTAAGGATGAAGAGAATACAGGTGCTGACCGGTTGATGACAGAGCGTTGCAAAGACCGAGTGAATGCCTTGGCCATTGCCGTCATGAATATGTGGCCGGGCGTAAGACTGCGAGTGACGGAGGGCTGG…
XM_026678704.1	Notechis_scutatus	Squamata	Dhh	ATGGCTTGGCGCAGGCTTACCCTGGTCAACCTGCTTGGGCTTTGCTTGACCAGCTGCCTCCTGTGCCCTGCTCAGGGCTGTGGCCCAGGCAGGGGGCCAGTGGGACGGAAGCAGTCCAGCCGCAGAAGCCTGGCCCCGCTGCAGTACAAGCAGTTTGTGCCCAATGTGGCGGAGCAGACCCTGGGAGCCAGTGGCAAAGCCGAGGGCAAAATCAGCCGCCACTCCGAGCGCTTCAAGGTCTTGGTGCCCAACTACAACCCTGACATCATCTTTAAGGATGAAGAGAATACAGGTGCTGACCGGTTGATGACAGAGCGTTGCAAAGACCGAGTGAATGCCTTGGCCATTGCCGTCATGAATATGTGGCCGGGCGTAAGACTGCGAGTGACGGAGGGCTGG…
XM_026659628.1	Terrapene_mexicana	Testudines	Dhh	ATGCCCCGGCACGGCCCGCTGGCGCTCAGCCTGCTCTGCCTGGCCTGCTGCCTGCTGCCGGGCCGGGGCTGCGGGCCGGGCCGGGGCCCGCCGGGGCGCCGGCCACAGGCCCGGAGGCACCTGGTGCCGTTGCGCTACAAGCAGTTCGTGCCCAACGCGCCCGAGCAGACGCTGGCGGCGAGCGGGCGGGCCGAGGGCCGGCTGGGGCGCCGCGCCGAGCGGTTCCGGGACCTGGTGCCCAACTACAACCCCGACATCATCTTCAAGGACGAGGAGAACACGGGGGCCGACCGGCTCATGAGCCAGCGCTGCAAGGACTGTGTGAACGCGCTGGCCATTGCCGTGATGAACATGTGGCCCGGCGTGAAGCTGCGGGTGACGGAAGGCTGGGACGAAGAT…
XM_020783057.1	Pogona_vitticeps	Squamata	Dhh	ATGGCCTGGCGCAGGCATGCCTTGCTCTGCCCGCTTGGACTGTGCCTGGTGATTTGGCCCCTGCTGCTTCCTGCAGGGGGCTGCGGCCCAGGGAGGGGCCCGGTGGGGCGGAAGCCTTATGCCCGCAAGAACCTGACTCCCCTGCAGTATAAACAATTTGTGCCCAATGTTGCGGAGCAGACCTTGGGGGCCAGCGGGAAGGCAGAGGGCAAAATAACTCGCCGCTCGGACCGCTTCAAGGACTTGGTGCCCAATTACAACCCTGACATCATCTTTAAGGATGAAGAGAACACAGGGGCGGACCGGCTGATGACTGAGCGTTGCAAGGACAGAGTGAATGCTTTGGCGATTGCGGTGATGAACATGTGGCCAGGCATCAGGCTGCGAGTGACGGAGGGC…
XM_015814749.1	Protobothrops_mucrosquamatus	Squamata	Dhh	ATGGCTTGGCGCAGGCTTGCCTTGGTCAGCCTGCTTGGGCTTTGCTTGACCAGCTGCCTCCTGTGCCCTGCTCAGGGCTGTGGCCCTGGCAGGGGGCCGGTGGGACGGAAGCAGTCCAGCCGCAGAAGCCTGGCCCCGCTGCAGTACAAGCAGTTTGTGCCCAATGTGGCGGAACAGACCCTTGGGGCCAGTGGCAAAGCCGAGGGCAAAATCAGCCGCCACTCGGAAAGCTTCCAGGTCCTGGTGCCCAACTACAACCCTGACATCATCTTTAAGGATGAAGAGAATACAGGTGCAGACCGGTTGATGACAGAGCGTTGCAAAGACCGAGTGAACGCCTTAGCGATTGCCGTCATGAATATGTGGCCGGGCATAAGACTGCGAGTGACGGAAGGCTGG…
XM_015405895.1	Gekko_japonicus	Squamata	Dhh	ATGGCGTGTCCCCGGCTGGCCTTGCTCGGCCTCTGCTGGGCTAGCTGCCTCCTGCCCCTTGCCCTGGGCTGTGGTCCGGGCAGGGGGCCGGTGGGGCAGAAGCCCTACAACCGCAAGCCTCTGACCTCCCTGCAGTACAAGCAGTCGGTGCCCGACGTGGCGGAGCAGACGCTGGGGGCCAGCGGGAAAGCCGAGGGCAAAATCAGCCGCGACTCGGAACGCTTCAAGGACTTAGTGCCCAATTATAACCCCGACATCATCTTTAAGGACGAAGAGAACACCGGGGCCGACCGGCTGATGACCGAGCGCTGCAAGGACCGTGTCAACACCTTGGCCATTGCCGTGATGAACAAGTGGCCGGGTGTCAGGCTGCGAGTGACCGAAGGCTGGGACGAAGAT…
XM_007437284.2	Python_bivittatus	Squamata	Dhh	ATGGCTTGGCGCAGGCTTGCTGTGGTCAGCCTGCTTGGGCTTTGCTTGGCCAGCTGCCTCCTGTCCCCTGCTCAGGGCTGTGGCCCAGGCAGGGGGCCAGTGGGACGGAAGCAGTCTAGCCGCAAAAGCCTGGCCCCTCTGCAGTACAAGCAGTTTGTGCCCAACGTGGCGGAACAGACCCTGGGGGCCAGTGGGAAAGCGGAGGGCAAAATCAGCCGCCACTCAGAGCGCTTCAAGGTCCTGGTGCCCAACTACAACCCTGACATCATCTTTAAGGATGAAGAGAATACAGGTGCAGACCGGTTGATGACAGAGCGTTGCAAAGACCGAGTGAACGCCTTGGCCATTGCCGTCATGAATATGTGGCCAGGCGTCAGGCTACGGGTGACGGAGGGCTGG…
XM_005308439.2	Chrysemys_picta	Testudines	Dhh	ATGCCCCGGCACGGCCCGCTGGCGCTCACCCTGCTCTGCCTGGCCTGCTGCCTGCTGCTGCCGGGCCGGGGCTGCGGGCCGGGCCGGGGCCCGCCGGGGCGCCGGCGACAGGCCCGGAGGCACCTGGTGCCGCTGCATTACAAGCAGTTCGTGCCCAACGCGCCCGAGCAGACGCTGGCTGCGAGCGGCCGGGCCGAGGGCCGGCTGGGGCGCCGCGCCGAGCGGTTCCGGGACCTGGTGCCCAACTACAACCCCGACATCATCTTCAAGGACGAGGAGAACACGGGGGCCGACCGGCTCATGACCCAGCGCTGCAAGGACCGTGTGAACGCGCTGGCCATTGCCGTGATGAACATGTGGCCCGGCGTGAAGCTGCGGGTGACGGAAGGCTGGGACGAA…
RSAE01425196.1	Hydrophis_cyanocinctus	Squamata	Dhh	ATGGCTTGGCGCAGGCTTACCCTGGTCAACCTGCTTGGGCTTTGCTTGACCAGCTGCCTCCTGTGCCCTGCTCAGGGCTGTGGCCCAGGCAGGGGGCCAGTGGGACGGAAGCAGTCCAGCCGCAGAAGCCTGGCCCCGCTGCAATACAAGCAGTTTGTGCCCAATGTGGCGGAACAGACCCTGGGAGCCAGTGGCAAAGCCGAGGGCAAAATCAGCCGCCACTCCGAGCGCTTCAAGGCCTTGGTGCCCAACTACAACCCTGACATCATCTTTAAGGATGAAGAGAATACAGGTGCTGACCGGTTGATGACAGAGCGTTGCAAAGACCGAGTGAATGCCTTGGCCATTGCCGTCATGAATATGTGGCCGGGCGTAAGACTGCGAGTGACGGAGGGCTGG…
RSAD01284046.1	Hydrophis_hardwickii	Squamata	Dhh	ATGGCTTGGCGCAGGCTTACCCTGGTCAACCTGCTTGGGCTTTGCTTGACCAGCTGCCTCCTGTGCCCTGCTCAGGGCTGTGGCCCAGGCAGGGGGCCAGTGGGACGGAAGCAGTCCAGCCGCAGAAGCCTGGCCCCGCTGCAATACAAGCAGTTTGTGCCCAATGTGGCGGAACAGACCCTGGGAGCCAGTGGCAAAGCCGAGGGCAAAATCAGCCGCCACTCCGAGCGCTTCAGGGTCTTGGTGCCCAACTACAACCCTGACATCATCTTTAAGGATGAAGAGAATACAGGTGCTGACCGGTTGATGACAGAGCGTTGCAAAGACCGAGTGAATGCCTTGGCCATTGCCGTCATGAATATGTGGCCGGGCGTAAGACTGCGAGTGACGGAGGGCTGG…
QLTV01003279.1	Thermophis_baileyi	Squamata	Dhh	ATGGCTTGGCGCAGGCTTACCCTGGTCAACCTGCTTGGGCTTTGCTTGACCAGCTGCCTCCTGTGCCCTGCTCAGGGCTGTGGCCCGGGCAGGGGGCCGGTGGGACGGAAGCAGTCCAGCCGCAGAAGCCTGGCCCCGCTGCAGTACAAGCAGTTTGTGCCCAACGTGGCGGAACAGACCCTGGGGGCCAGTGGCAAAGCCGAGGGCAAAATCAGCCGCCACTCGGAGCGCTTCAAGGTCCTGGTGCCCAACTACAACCCTGACATCATCTTTAAGGATGAAGAGAATACAGGTGCTGACCGGTTGATGACAGAGCGTTGCAAGGACCGAGTGAATGCCTTGGCCATTGCCGTCATGAATATGTGGCCGGGCGTAAGACTGCGAGTGACGGAGGGCTGG…
scaffold604	Ophisaurus_gracilis	Squamata	Dhh	ATGGCCTGGCACAGGCTTCTCTTGCTCGGGCTGAGCTTGGCTAGCTTGTTGCTTCCCCCTGCTCAGGGCTGCGGCCCAGGCAGGGGGCCGGTGGGACGCAAGCCCTACACACGCAAGAACCTGACCCCATTGCAGTACAAGCAGTTTGTGCCCAATGTTGCGGAGCAGACCTTGGGTGCCAGCGGGAAAGCAGAGGGCAAAATCAGCCGCCATTCAGAACACTTCAAGGATCTGGTGCCCAATTACAACCCTGACATCATCTTTAAGGATGAAGAGAACACAGGTGCAGACCGGTTGATGACTGAGCGTTGCAAGGATAGAGTGAATGCCTTGGCCATTGCTGTGATGAACATGTGGCCGGGCACCAGGCTGCGCGTGACGGAGGGCTGGGACGAAGAT…
JPMF01162588.1	Crotalus_pyrrhus	Squamata	Dhh	ATGGCTTGGCGCAGGCTTGCTTTAGTCAGCCTGCTTGGGCTTTGCTTGACCAGCTGCCTCCTGTGTCCTGCTCACGGCTGTGGCCCTGGCAGGGGGCCGGTGGGACGGAAGCAGTCCAGCCGCAGAAGCCTGGCCCCGCTACAGTACAAGCAGTTTGTGCCCAATGTGGCGGAACAGACCCTTGGGGCCAGTGGCAAAGCCGAGGGCAAAATCAGTCGCCGCTCGGAAAGCTTCAAGGTCCTGGTGCCCAACTACAACCCTGACATCATCTTTAAGGATGAAGAGAATACAGGTGCAGACCGGTTGATGACAGAGCGCTGCAAAGATCGAGTGAATGCCTTAGCGATTGCCGTCATGAATATGTGGCCGGGCATAAGACTGCGAGTGACGGAAGGCTGG…
XM_003223232.2	Anolis_carolinensis	Squamata	Dhh	ATGGCTTTGCCCTGCTTGGCCTGGCTCTGCTTGGCCGGCTGCCTCCTGCTGCCCCTGGCACACAGCTGTGGCCCTGGGAGGGGTCCCCCGGGCAGGAAGCCTCATGGGCGCAAGAACCTGATCCCGCTGCAGTACAAGCAGTTTGTGCCCAGCGTGGCGGAGCAGACCCTGGGGGCCAGCGGGAAGGCCGAGGGCAAGGTGGGCCGACACTCCTCACGCTTCAAGGACCTGGTGCCCAACTACAACCCGGACATCATCTTCAAGGACGAGGAGAACACGGGCGCAGACCGGCTCATGACCGAGCGATGCAAGGATCGGGTGAATGCTTTGGCCATCGCTGTGATGAACATGTGGCCAGGCATCAGGCTGCGGGTGACTGAAGGCTGGGATGAAGATGGG…
QXTE01000170.1	Platysternon_megacephalum	Testudines	Dhh	ATGCCCTGGCACGGCCCGCTGGCGCTCAGCCTGCTCTGCCTGGCCTGCTGCCTGCTGCTGCCGGGCCGGGGCTGCGGGCCGGGCCGGGGCCCGCCGGGGCGCAGGCGACAGGCCCGGCGGCACCTGGTCCCGCTGCGCTACAAGCAGTTCGTGCCCAACGTGCCGGAGCAGACGCTGGCAGCGAGCGGCCGGGCCGAGGGCCGCCTGGGGCGCCGCGCCGAGCGGTTCCGGGACCTGGTGCCGAACTACAACCCCGACATCATCTTCAAGGACGAGGAGAACACGGGGGCCGACCGGCTCATGAGCCAGCGCTGCAAGGACCGTGTGAACGCACTGGCCATCGCCGTGATGAACATGTGGCCTGGTGTGAAGCTGCGGGTGACGGAAGGCTGGGACGAA…
PPEB01001314.1	Gopherus_agassizii	Testudines	Dhh	ATGCCCTGGCACGGGCCGCTGGCGCTCAGCCTGCTCTGCCTGGCCTGCTGCCTGCTGCTGCCGGGCCGGGGCTGCGGGCCGGGCCGGGGCCCGCCGGGGCGCAGGCGACAGGCCCGGCGGCACCTGGTCCCGCTGCGCTACAAGCAGTTCGTGCCCAACGTGCCCGAGCAGACGCTGGCGGCCAGCGGGCGGGCCGAGGGCCGGCTGGGGCGCCGCGCCGAGCGGTTCCGGGACCTGGTGCCCAACTACAACCCCGACATCATCTTCAAGGACGAGGAGAACACGGGGGCGGACCGGCTCATGAGCCAGCGCTGCAAGGATCGTGTGAACGCGCTGGCCATTGCTGTGATGAACATGTGGCCCGGCGTGAAGCTGCGGGTGACGGAAGGCTGGGACGAA…
PDHV01000456.1	Crotalus_viridis	Squamata	Dhh	ATGGCTTGGCGCAGGCTTGCCTTAGTCAGCCTGCTTGGGCTTTGCTTGACCAGCTGCCTCCTGTGTCCTGCTCACGGCTGTGGCCCTGGCAGGGGGCCGGTGGGACGGAAGCAGTCCAGCCGCAGAAGCCTGGCCCCGCTGCAGTACAAGCAGTTTGTGCCCAATGTGGCGGAACAGACCCTTGGGGCCAGTGGCAAAGCCGAGGGCAAAATCAGTCGCCGCTCGGAAAGCTTCAAGGTCCTGGTGCCCAACTACAACCCTGACATCATCTTTAAGGATGAAGAGAATACAGGTGCAGACCGGTTGATGACAGAGCGCTGCAAAGATCGAGTGAATGCCTTAGCGATTGCCGTCATGAATATGTGGCCGGGCATAAGACTGCGAGTGACGGAAGGCTGG…
NW_013658565.1	Thamnophis_sirtalis	Squamata	Dhh	ATGGCTTGGCGCAGGCTTACCCTGGTCAACCTGCTTGGGCTTTGCTTGACCAGCTGCCTTCTGTGCCCTGCTAAGGGCTGTGGCCCGGGCAGGGGGCCGGTAGGACGGAAGCAGTCCAGCCGCAGAAGCCTGGCCCCGCTGCAATACAAGCAGTTTGTGCCCAACGTGGCGGAACAGACCCTGGGGGCCAGTGGCAAAGCCGAGGGCAAAATCAGCCGCCACTCGGAGCGCTTCAAGATCCTGGTGCCCAACTACAACCCTGACATCATCTTTAAGGATGAAGAGAATACAGGTGCTGACCGGTTGATGACAGAGCGTTGCAAAGACCGAGTGAATGCCTTGGCCATCGCCGTCATGAATATGTGGCCGGGCGTAAGACTGCGAGTGACGGAGGGCTGG…
ML123213.1	Cuora_mccordi	Testudines	Dhh	ATGCCCTGGCACGGGCCGCTGGCGCTCAGCCTGCTCTGCCTGGCCTGCTGCCTGCTGCTGCCGGGCCGGGGCTGCGGGCCGGGCCGGGGCCCGCCGGGGCGCAGGCGGCAGGCCCGGCGGCACCTGGCCCCGCTGCGCTACAAGCAGTTCGTGCCCAACGTGCCCGAGCAGACGCTGGCGGCCAGCGGGCGGGCCGAGGGCCGGCTGGGGCGCCGCGCCGAGCGGTTCCGGGACCTGGTGCCCAACTACAACCCCGACATCATCTTCAAGGACGAGGAGAACACGGGGGCGGACCGGCTCATGAGCCAGCGCTGCAAGGACCGTGTGAACGCGCTGGCCATTGCTGTGCTGAACATGTGGCCCGGCGTGAAGCTGCGGGTGACGGAAGGCTGGGACGAA…
MDXI01007107.1	Malaclemys_terrapin	Testudines	Dhh	ATGCCCTGGCACGGCCCGCTGGCGCTCACCCTGCTCTGCCTGGCCTGCTGCCTGCTGCTGCCGGGCCGGGGCTGCGGGCCGGGCCGGGGCCCGCCGGGGCGCCGGCGACAGGCCCGGAGGCACCTGGTGCCGCTGCACTACAAGCAGTTCGTGCCCAACGCGCCCGAGCAGACGCTGGCTGCGAGCGGCCGGGCTGAGGGCCGGCTGGGGCGCCGCGCCGAGCGGTTCCGGGACCTGGTGCCCAACTACAACCCCGACATCATCTTCAAGGACGAGGAGAACACGGGGGCCGACCGGCTCATGAGCCAGCGCTGCAAGGACCGTGTGAACGCGCTGGCCATCGCCGTGATGAACATGTGGCCCGGCGTGAAGTTGCGGGTGACGGAAGGCTGGGACGAA…
LVCR01004738.1	Crotalus_horridus	Squamata	Dhh	ATGGCTTGGCGCAGGCTTGCCTTAGTCAGCCTGCTTGGGCTTTGCTTGACCAGCTGCCTCCTGTGCCCAGCTCAGGGCTGTGGCCCTGGCAGGGGGCCGGTGGGACGGAAGCAGTCCAGCCGCAGAAGCCTGGCCCCGCTGCAGTACAAGCAGTTTGTGCCCAATGTGGCGGAACAGACCCTTGGGGCCAGTGGCAAAGCCGAGGGCAAAATCAGCCGCCGCTCAGAAAGCTTCAAGGTCCTGGTGCCCAACTACAACCCTGACATCATCTTTAAGGATGAAGAGAATACAGGTGCAGACCGGTTGATGACAGAGCGCTGCAAAGATCGAGTGAATGCCTTAGCGATTGCCGTCATGAATATGTGGCCGGGCATAAGACTGCGAGTGACGGAAGGCTGG…
KN633926.1	Vipera_berus	Squamata	Dhh	ATGGCTTGGCGAAGGCTTGCCTTAGTCAGCCTGCTTGGGCTTTGCTTGACCAGCTGCCTCCTGTGCCCTGCTCAGGGCTGTGGCCCTGGCAGGGGGCCGGTGGGACGGAAGCAGTCCAGCCGCAGAAGCCTGGCCCCGCTGCAGTACAAGCAGTTTGTGCCCAATGTGGCGGAACAGACCCTTGGGGCCAGCGGCAAAGCCGAGGGCAAAATCAGCCGCCACTCGGAAAGCTTCAAGGTCCTGGTGCCCAACTACAACCCTGACATCATCTTTAAGGATGAAGAGAATACAGGTGCAGATCGGTTGATGACAGAGCGTTGCAAAGACCGAGTGAATGCCTTAGCGATTGCCGTCATGAATATGTGGCCAGGCATAAGACTGCGAGTGACGGAAGGCTGG…
JTLQ01312099.1	Pantherophis_guttatus	Squamata	Dhh	ATGGCTTGGCGCAGGCTTACCCTGGTCAACCTGCTTGGGCTTTGCTTGACCAGCTGCCTCCTGTGCCCTGCTCAGGGCTGTGGCCCAGGCAGGGGACCGGTGGGACGGAAGCAGTCCAGCCGCAGAAGCCTGGCCCCGCTGCAGTACAAGCAGTTTGTGCCCAACGTGGCGGAACAGACTCTGGGGGCCAGTGGCAAAGCCGAGGGCAAAATCAGCCGTCACTCGGAGCGCTTCAAGGTCCTGGTGCCCAACTACAACCCTGACATCATCTTTAAGGATGAAGAGAATACAGGTGCTGACCGGTTGATGACAGAGCGTTGCAAAGACCGAGTGAATGCCTTGGCCATTGCCGTCATGAATATGTGGCCGGGCGTAAGACTGCGAGTGACGGAAGGCTGG…
BFFQ01082550.1	Protobothrops_flavoviridis	Squamata	Dhh	ATGGCTTGGCGCAGGCTTGCCTTAGTCAGCCTGCTTGGGCTTTGCTTGACCAGCTGCCTCCTGTGCCCCGCTCAGGGCTGTGGCCCTGGCAGGGGGCCGGTGGGACGGAAGCAGTCCAGCCGCAGAAGCCTGGCCCCGCTGCAGTACAAGCAGTTTGTGCCCAATGTGGCGGAACAGACCCTTGGGGCCAGTGGCAAAGCCGAGGGCAAAATCAGCCGCCACTCGGAAAGCTTCCAGGTCCTGGTGCCCAACTACAACCCTGACATCATCTTTAAGGATGAAGAGAATACAGGTGCAGACCGGTTGATGACAGAGCGTTGCAAAGATCGAGTGAACGCCTTAGCGATTGCCGTCATGAATATGTGGCCGGGCATAAGACTGCGAGTGACGGAAGGCTGG…
BDOT01000106.1	Paroedura_picta	Squamata	Dhh	ATGGCGGGGCCCGGGCTGGCCGTGCTGGGGCTGTGCTGGGCGAGCTGCCTCCTGGCGCCCCTGGCGCTGGGCTGCGGGCCGGGCCGGGGTCCGGTGGGGCAGAAGCCCTACCACCGCAAGGCCCTCACGGCGCTGCAGTACAAGCAGTCGGTGCCCGACGTGGCCGAGCAGACGCTGGGCGCGAGCGGGAGAGCGGAGGGCAAGATCAGCCGCGCCGACGACGCCTTCAGGGACTTGGTGCCCAATTATAACCCCGACATCATCTTCAAGGACGAGGAGGGCACCGGCGCCGACCGCCTCATGACCCAGCGCTGCAAGGACCGGGTCAACACCTTGGCCATTGCAGTGATGAACAAGTGGCCGGGGGTCAGGCTCCGAGTGACAGAAGGCTGGGATGAA…
XM_026708085.1	Pseudonaja_textilis	Squamata	IHH	ATGAAGGCGGCGCGGCTGCTGCTCCTCCTCAGCGGCTGCGCGCTGCTCCTGTTGGCGCCGGAGGTGCGCGGCTGCGGGCCGGGCCGGGTAGTGGGCAGCCGTCGCCGCCTGCCCAGGAAGCTTATCCCTCTCGCCTACAAGCAGTTCAGCCCCAACGTGCCCGAGAAGACGCTGGGCGCAAGCGGCAGGTACGAAGGCAAGATCGCCCGCAACTCGGAGCGCTTCAAGGAGCTGACGCCCAACTACAACCCGGACATCATCTTCAAAGATGAGGAGAACACCGGCGCCGACCGCCTCATGACCCAGCGTTGCAAGGACCGCCTAAACTCCCTAGCCATTTCCGTGATGAACCAGTGGCCAGGGGTGAAGCTCCGGGTGACTGAAGGTTGGGATGAAGAT…
XM_026665553.1	Notechis_scutatus	Squamata	IHH	ATGAAGGCGGCGCGGCTGCTGCTCCTCCTCAGCGGCTGCGCGCTGCTCCTGTTGGCGCCGGAGGTGCGCGGCTGCGGGCCGGGCCGGGTAGTGGGCAGCCGTCGCCGCCTGCCCAGGAAGCTCATCCCTCTCGCCTACAAGCAGTTCAGCCCCAACGTGCCCGAGAAGACGCTGGGCGCAAGCGGCAGGTACGAAGGCAAGATCGCCCGCAACTCGGAGCGCTTCAAGGAGCTGACGCCCAACTACAACCCGGACATCATCTTCAAAGATGAGGAGAACACCGGCGCCGACCGCCTCATGACCCAGCGTTGTAAGGACCGCCTAAACTCCCTAGCCATTTCCGTGATGAATCAGTGGCCAGGGGTGAAGCTCCGGGTGACTGAAGGTTGGGACGAAGAT…
XM_015820496.1	Protobothrops_mucrosquamatus	Squamata	IHH	ATGAAGGCGGCGCGGCTGCTGCTCCTCCTCAGCGGCTGCGCGCTGCTCCTGTTGGCGCCGGAGGTGCGCGGCTGCGGGCCGGGCCGTGTAGTGGGCAGCCGCCGCCGCCAGCCCAGGAAGCTCATCCCTCTCGCCTACAAGCAGTTCAGCCCCAACGTGCCCGAGAAGACGCTGGGCGCCAGCGGCAGGTACGAGGGCAAGATCGCCCGCAACTCGGAGCGCTTCAAGGAGCTGACGCCCAACTACAACCCGGACATCATCTTCAAAGACGAGGAGAACACCGGCGCCGACCGCCTCATGACCCAGCGCTGCAAAGACCGCCTAAACTCCCTAGCCATTTCAGTGATGAACCAGTGGCCAGGGGTGAAGCTCCGGGTGACAGAAGGCTGGGATGAAGAT…
XM_014063065.1	Thamnophis_sirtalis	Squamata	IHH	ATGAAGGCGGCGCGGCTGCTGCTCCTCCTCAGCGGCTGCGCGCTGCTCCTGTTGGCGCCGGAGGTGCGCGGCTGCGGGCCGGGCCGGGTAGTGGGCAGCCGTCGCCGCCCGCCGAGGAAGCTCATCCCTCTCGCCTACAAACAGTTCAGCCCCAACGTGCCCGAGAAGACGCTGGGCGCCAGCGGCAGGTACGAAGGCAAAATCGCCCGCAACTCGGAGCGCTTCAAGGAGCTGACGCCCAACTACAACCCGGACATCATCTTCAAAGACGAGGAGAACACCGGCGCCGACCGCCTCATGACCCAGCGTTGTAAGGACCGCCTAAACTCCCTAGCCATTTCAGTGATGAACCAGTGGCCAGGGGTGAAGCTCCGGGTGACAGAAGGTTGGGATGAAGAT…
XM_007419822.3	Python_bivittatus	Squamata	IHH	ATGAAGGCGGCGCGGCTGCTGCTCCTCCTCAGCGGCTGCGCGCTGCTCCTGTTGGCGCCGGAGGTGCGCGGCTGCGGGCCGGGTCGCGTAGTGGGCAGCCGCCGCCGCCCGCCCAGGAAGCTCATCCCCCTCGCCTACAAGCAGTTCAGCCCCAACGTGCCCGAGAAGACGCTGGGCGCTAGCGGCAGGGACGAGGGCAAGATCGCCCGCAACTCGGAGCGCTTCAAGGAGCTCACGCCCAACTACAACCCGGACATCATCTTCAAAGACGAGGAGAACACCGGCGCCGACCGTCTCATGACCCAGCGCTGTAAGGACCGCCTAAACTCCCTAGCAATTTCAGTAATGAACCAGTGGCCAGGGGTAAAGCTTCGTGTAACAGAAGGCTGGGATGAAGAT…
XM_003214933.3	Anolis_carolinensis	Squamata	IHH	ATGAAGGCGGCGCGCCGGCTGCTGCTGCTGAGCGGGCGGGCGCTGCTGCTGCTGCCTCCGTCGGCGCGCGGGTGCGGGCCGGGGCGCGTGGTGGGGAGCCGCCGGCGCCCCCCGCGGAAGCTGGTCCCGCTGGCCTACAAGCAGTTCAGCCCCAACGTGCCCGAGAAGACGCTGGGCGCCAGCGGGAGGTACGAGGGCAAGATCGCCCGCAACTCCGAGCGCTTCAAGGAACTCACGCCCAACTACAACCCGGACATCATCTTCAAGGACGAGGAGAACACCGGCGCAGACCGCCTCATGACCCAGCGCTGCAAGGATCGCCTCAACTCTCTGGCCATCTCGGTCATGAACCAATGGCCTGGGGTGAAGCTGCGGGTCACAGAGGGCTGGGATGAAGAT…
JPMF01072521.1	Crotalus_pyrrhus	Squamata	IHH	ATGAAGGCGGCGCGGCTGCTGCTCCTCCTCAGCGGCTGCGCGCTGCTCCTGTTGGCGCCCGAGGTGCGCGGCTGCGGGCCGGGCCGTGTAGTGGGCAGCCGCCGCCGTCAGCCCAGGAAGCTCATCCCTCTCGCCTACAAGCAGTTCAGCCCCAACGTGCCCGAGAAGACGCTGGGCGCGAGCGGCAGGTACGAGGGCAAGATCGCCCGCAACTCGGAGCGCTTCAAGGAGCTGACGCCCAACTACAACCCGGACATCATCTTCAAAGACGAGGAGAACACCGGCGCCGACCGCCTCATGACCCAGCGTTGCAAAGACCGCCTAAACTCCCTAGCCATTTCAGTGATGAACCAGTGGCCAGGGGTGAAGCTCCGGGTGACAGAAGGTTGGGATGAAGAT…
PDHV01001831.1	Crotalus_viridis	Squamata	IHH	ATGAAGGCGGCGCGGCTGCTGCTCCTCCTCAGCGGCTGCGCGCTGCTCCTGTTGGCGCCCGAGGTGCGCGGCTGCGGGCCGGGCCGTGTAGTGGGCAGCCGCCGCCGTCAGCCCAGGAAGCTCATCCCTCTCGCCTACAAGCAGTTCAGCCCCAACGTGCCCGAGAAGACGCTGGGCGCGAGCGGCAGGTACGAGGGCAAGATCGCCCGCAACTCGGAGCGCTTCAAGGAGCTGACGCCCAACTACAACCCGGACATCATCTTCAAAGACGAGGAGAACACCGGCGCCGACCGCCTCATGACCCAG---TGCAAAGACCGCCTAAACTCCCTAGCCATTTCAGTGATGAACCAGTGGCCAGGGGTGAAGCTCCGGGTGACAGAAGGTTGGGATGAAGAT…
OFHV01001501.1	Lacerta_bilineata	Squamata	IHH	ATGAAGGCGGCGCGGCTCCTGCTCCTGCTGAGCGGCTGCGCTCTGCTCTTGCTAGCGCCGCCGGTGCGCGGCTGCGGGCCGGGCCGAGTGGTAGGCAGCCGCCGCCGCCCTCCCAGGAAGCTCATCCCGCTTGCCTACAAGCAATTCAGCCCCAACGTGCCCGAGAAGACGCTGGGCGCCAGCGGCAGGTACGAAGGCAAGATCGCCCGCAACTCCGAGCGCTTCAAGGAGCTCACGCCCAACTACAACCCGGACATCATTTTCAAGGACGAGGAGAACACGGGCGCCGACCGCCTCATGACCCAGCGCTGCAAGGATCGCCTAAACTCTCTGGCCATCTCGGTAATGAACCAGTGGCCAGGAGTAAAGCTGCGTGTGACGGAAGGCTGGGATGAAGAT…
OFHU01001518.1	Lacerta_viridis	Squamata	IHH	ATGAAGGCGGCGCGGCTCCTGCTCTTGCTGAGCGGCTGCGCTCTGCTCTTGCTAGCGCCGCCGGTGCGCGGCTGCGGGCCGGGCCGAGTGGTAGGCAGCCGCCGCCGCCCTCCCAGGAAGCTCATCCCGCTTGCCTACAAGCAATTCAGCCCCAACGTGCCCGAGAAGACGCTGGGCGCCAGCGGCAGGTACGAAGGCAAGATCGCCCGCAACTCCGAGCGCTTCAAGGAGCTCACGCCCAACTACAACCCGGACATCATTTTCAAGGACGAGGAGAACACGGGCGCCGACCGCCTCATGACCCAGCGCTGCAAGGATCGCCTAAACTCTCTGGCCATCTCGGTAATGAACCAGTGGCCAGGAGTAAAGCTGCGTGTGACGGAAGGCTGGGATGAAGAT…
JTLQ01014830.1	Pantherophis_guttatus	Squamata	IHH	ATGAAGGCGGCGCGGCTGCTGCTTCTCCTCAGCGGCTGCGCGCTGCTCCTCTTGGCGCCGGAGGTGAGCGGCTGCGGGCCGGGCCGGGTAGTGGGCAGCCGTCGTCGCCCGCCCAGGAAACTCATCCCTCTCGCCTACAAGCAGTTCAGCCCCAACGTGCCCGAGAAGACGCTGGGCGCAAGCGGCAGGTACGAAGGCAAGATCGCCCGCAACTCGGAGCGCTTCAAGGAGCTGACGCCCAACTACAACCCGGACATCATCTTCAAAGACGAGGAGAACACGGGCGCCGACCGCCTCCTTCCTCAGCGTTGTAAGGACCGCCTAAACTCCCTAGCCATTTCAGTGATGAACCAGTGGCCAGGGGTGAAGCTCCGGGTGACGGAAGGTTGGGATGAAGAT…
BDOT01000089.1	Paroedura_picta	Squamata	IHH	ATGAAGGCGGCCCGGCTGCGGCTGCGGCTCCCGCTCCTGCTGCTGCTGCTGCTGGCGCCGGCCGTGCGCGGCTGCGGGCCGGGCCGCGTGGTGGGCAGCCGCCGCCGGCCGCCGCGGAAGCTCGTCCCGCTCGCCTACAAGCAGTTCAGCCCCAACGTGCCCGAGAAGACGCTGGGCGCCAGCGGCAGGTACGAGGGCAAGGTGGCCCGCGCCTCCGAGCGCTTCAAGGAGCTCACGCCCAACTACAACCCCGACATCATCTTCAAGGACGAGGAGAACACCGGCGCCGACCGCCTCATGACCCAGCGCTGCAAGGATCGTCTCAACTCACTGGCCATCTCGGTAATGAACCAGTGGCCAGGCGTAAAGCTGCGTGTGACCGAGGGCTGGGATGAAGAC…
BFFQ01000121.1	Protobothrops_flavoviridis	Squamata	IHH	ATGAAGGCGGCGCGGCTGCTGCTCCTCCTCAGCGGCTGCGCGCTGCTCCTGTTGGCGCCGGAGGTGCGCGGCTGCGGGCCGGGCCGTGTAGTGGGCAGCCGCCGCCGCCAGCCCAGGAAGCTCATCCCTCTCGCTTACAAGCAGTTCAGCCCCAACGTGCCCGAGAAGACGCTGGGCGCGAGCGGCAGGTACGAGGGCAAGATCGCCCGCAACTCGGAGCGCTTCAAGGAGCTGACGCCCAACTACAACCCGGACATCATCTTCAAAGACGAGGAGAACACCGGCGCCGACCGCCTCATGACCCAGCGCTGCAAAGACCGCCTAAACTCCCTAGCCATTTCAGTGATGAACCAGTGGCCAGGGGTGAAGCTCCGGGTGACAGAAGGCTGGGATGAAGAT…
KN632752.1	Vipera_berus	Squamata	IHH	ATGAAGGCGGCGCGGCTGCTGCTCCTCCTCAGCGGCTGCGCGCTGCTCCTCTTGGCGCCGGAGGTGCGCGGCTGCGGGCCGGGCCGTGTAGTGGGCAGCCGCCGCCGCCAGCCCAGGAAGCTCATCCCTCTCGCCTACAAGCAGTTCAGCCCCAACGTCCCCGAGAAGACCCTGGGCGCAAGCGGCAGGTACGAGGGCAAGATCGCCCGCAACTCGGAGCGCTTCAAGGAGCTGACGCCCAACTACAACCCGGACATCATCTTCAAAGACGAGGAGAACACCGGCGCCGACCGCCTCATGACCCAGCGCTGTAAAGACCGCCTAAACTCCCTAGCCATTTCAGTGATGAACCAGTGGCCAGGGGTGAAGCTCCGGGTGACAGAAGGTTGGGATGAAGAT…
LVCR01018466.1	Crotalus_horridus	Squamata	IHH	ATGAAGGCGGCGCGGCTGCTGCTCCTCCTCAGCGGCTGCGCGCTGCTCCTGTTGGCGCCCGAGGTGCGCGGCTGCGGGCCGGGCCGTGTAGTGGGCAGCCGCCGCCGTCAGCCCAGGAAGCTCATCCCTCTCGCCTACAAGCAGTTCAGCCCCAACGTGCCCGAGAAGACGCTGGGCGCGAGCGGCAGGTACGAGGGCAAGATCGCCCGCAACTCGGAGCGCTTCAAGGAGCTGACGCCCAACTACAACCCGGACATCATCTTCAAAGACGAGGAGAACACCGGCGCCGACCGCCTCATGACCCAGCGTTGCAAAGACCGCCTAAACTCCCTAGCCATTTCAGTGATGAACCAGTGGCCAGGGGTGAAGCTCCGGGTGACAGAAGGTTGGGATGAAGAT…
RSAE01491285.1	Hydrophis_cyanocinctus	Squamata	IHH	ATGAAGGCGGCGCGGCTGCTGCTGCTTCTCAGCGGCTGCGCGCTGCTCCTGTTGGCGCCGGAGGTGCGCGGCTGCGGGCCGGGCCGGGTAGTGGGCAGCCGTCGCCGCCTGCCCAGGAAGCTCATCCCTCTCGCCTACAAGCAGTTCAGCCCCAACGTGCCTGAGAAGACGCTGGGCGCAAGCGGCAGGTACGAAGGCAAGATCGCCCGCAACTCGGAGCGCTTCAAGGAGCTGACGCCCAACTACAACCCGGACATCATCTTCAAAGATGAGGAGAACACCGGCGCCGACCGCCTCATGACCCAGCGTTGTAAGGACCGCCTAAACTCTCTTGCCATTTCCGTGATGAACCAGTGGCCAGGAGTGAAGCTCCGGGTGACTGAAGGTTGGGATGAAGAT…
RSAD01365236.1	Hydrophis_hardwickii	Squamata	IHH	ATGAAGGCGGCGCGGCTGCTGCTGCTTCTCAGCGGCTGCGCGCTGCTCCTGTTGGCGCCGGAGGTGCGCGGCTGCGGGCCGGGCCGGGTAGTGGGCAGCCGTCGCCGCCTGCCCAGGAAGCTCATCCCTCTCGCCTACAAGCAGTTCAGCCCCAACGTGCCTGAGAAGACGCTGGGCGCAAGCGGCAGGTACGAAGGCAAGATCGCCCGCAACTCGGAGCGCTTCAAGGAGCTGACGCCCAACTACAACCCGGACATCATCTTCAAAGATGAGGAGAACACCGGCGCCGACCGCCTCATGACCCAGCGTTGTAAGGACCGCCTAAACTCTCTAGCCATTTCCGTGATGAACCAGTGGCCAGGAGTGAAGCTCCGGGTGACTGAAGGTTGGGATGAAGAT…
QVOM02000080.1	Salvator_merianae	Squamata	IHH	ATGAAGGCGGCGCGGCTGCTGCTCCTGCTGAGCGGCTGCGCGTTGCTCCTGCTGGCGCCGGCGGTGCGCGGCTGCGGGCCCGGCCGGGTCGTGGGCAGCCGCCGCCGCCCTCCCCGGAAGCTCATCCCGCTCGCCTACAAGCAGTTCAGTCCCAACGTGCCCGAGAAGACGCTGGGTGCCAGCGGCAGGTACGAGGGCAAGATCGCCCGCAACTCCGAGCGCTTCAAGGAGCTCACGCCCAACTACAACCCGGACATCATCTTCAAGGACGAGGAGAACACCGGCGCCGACCGCCTCATGACCCAGCGCTGCAAGGATCGTCTAAATTCTCTGGCCATTTCGGTAATGAACCAGTGGCCAGGGGTGAAGCTGCGTGTGACGGAGGGCTGGGATGAAGAT…
QLTV01020729.1	Thermophis_baileyi	Squamata	IHH	ATGAAGGCGGCGCGGCTGCTGCTCCTCCTCAGCGGCTGCGCGCTGCTCTTGTTGGCGCCGGAGGTGCGCGGCTGCGGGCCGGGCCGGGTAGTGGGCAGCCGTCGCCGCCCGCCCAGGAAGCTCATCCCTCTCGCCTACAAGCAGTTCAGCCCCAACGTGCCCGAGAAGACCCTGGGCGCAAGCGGCAGGTACGAAGGCAAGATCGCCCGCAACTCGGAGCGCTTCAAGGAGCTGACGCCCAACTACAACCCGGACATCATCTTCAAAGACGAGGAGAACACCGGCGCCGACCGCCTCATGACCCAGCGTTGTAAGGACCGCCTAAACTCCCTAGCCATTTCAGTGATGAACCAGTGGCCAGGGGTGAAGCTCCGGGTGACAGAAGGTTGGGATGAAGAT…
scaffold604	Ophisaurus_gracilis	Squamata	IHH	ATGACTGGAAGGCCACCTATCAGGGGTGCTGTAGCAGCAGGTTTCTTGCACCGCTGGAAGCTCATCCCGCTCGCCTACAAGCAGTTCAGCCCCAACGTGCCCGAGAAGACGCTGGGCGCCAGCGGCAGGTACGAGGGCAAGATCGCGCGCAACTCGGAGCGCTTCAAGGAGCTCACGCCCAACTACAACCCGGACATCATCTTCAAGGACGAGGAGAACACCGGTGCCGACCGCCTCATGACCCAGCGCTGCAAGGATCGCCTCAACTCTTTGGCCATCTCCGTAATGAACCAGTGGCCAGGGGTAAAGCTACGTGTGACGGAGGGCTGGGATGAAGACGGGCACCACTCCGAAGAGTCGCTGCACTACGAAGGCCGGGCAGTCGACATCACCACCTCT…
Hedgehog genes sequences information in Aves and Mammalia.
Accession No.	Scientific Name	Hedgehog gene	Seq
NM_204821.1	Gallus_gallus	SHH	ATGGTCGAAATGCTGCTGTTGACAAGAATTCTCTTGGTGGGCTTCATCTGCGCTCTTTTAGTCTCCTCTGGGCTGACTTGTGGACCAGGCAGGGGCATTGGAAAAAGGAGGCACCCCAAAAAGCTGACCCCGTTAGCCTATAAGCAGTTTATTCCCAATGTGGCAGAGAAGACCCTAGGGGCCAGTGGAAGATATGAAGGGAAGATCACAAGAAACTCCGAGAGATTTAAAGAACTAACCCCAAATTACAACCCTGACATTATTTTTAAGGATGAAGAGAACACGGGAGCTGACAGACTGATGACTCAGCGCTGCAAGGACAAGCTGAATGCCCTGGCGATCTCGGTGATGAACCAGTGGCCCGGGGTGAAGCTGCGGGTGACCGAGGGCTGGGACGAG…
XM_011572026.1	Aquila_chrysaetos	SHH	ATGGACGAAATGCTGCTGTTGACAAGAATTCTCTTGGTGGGCTTCATCTGCGCTCTTTTAGTCTCCTCTGGGCTGACTTGTGGACCAGGCAGGGGCATTGGAAAAAGGAGACACCCCAAAAAGCTGACCCCTTTAGCCTATAAGCAGTTTATTCCCAATGTGGCAGAGAAGACCCTAGGGGCCAGTGGAAGATATGAAGGGAAGATCACAAGAAACTCCGAGAGATTTAAAGAACTAACCCCAAATTACAACCCTGACATTATTTTTAAGGATGAAGAGAACACGGGAGCTGACAGACTGATGACTCAGCGCTGCAAGGACAAGCTGAACGCCTTGGCGATCTCGGTGATGAACCAGTGGCCCGGGGTGAAACTGCGGGTGACCGAGGGCTGGGACGAG…
XM_002190708.2	Taeniopygia_guttata	SHH	ATGGACGAAATGCTGCTGTTGACAAGAATTCTCTTGGTGGGCTTCATCTGCGCTCTTTTAGTCTCCTCTGGGCTGACTTGTGGACCAGGCAGGGGCATTGGAAAAAGGAAACACCCCCAAAAGCTGACCCCTTTAGCCTATAAGCAGTTTATTCCCAATGTGGCAGAGAAGACCCTAGGGGCCAGTGGAAGATATGAAGGGAAGATCACAAGAAACTCCGAGAGATTTAAAGAACTAACCCCAAATTACAACCCTGACATTATTTTTAAGGATGAAGAGAACACGGGAGCTGACAGACTGATGACTCAGCGCTGCAAGGACAAGCTGAACGCTCTGGCGATCTCGGTGATGAACCAGTGGCCCGGAGTAAAGCTGCGGGTAACCGAGGGCTGGGACGAG…
XM_005142120.2	Melopsittacus_undulatus	SHH	ATGGACGAAATGCTGCTGTTGACAAGAATTCTCTTGGTGGGCTTCATCTGCGCTCTTTTAGTCTCCTCTGGGCTGACTTGTGGACCAGGCAGGGGCATTGGAAAAAGGAGACACCCCAAAAAGCTGACCCCTTTAGCCTATAAGCAGTTTATTCCCAATGTGGCAGAGAAGACCCTAGGGGCCAGTGGAAGATATGAAGGGAAGATCACAAGAAACTCCGAGAGATTTAAAGAACTAACCCCAAATTACAACCCTGACATTATTTTTAAGGATGAAGAGAACACTGGAGCTGACAGACTGATGACTCAGCGCTGCAAGGACAAGCTGAACGCCCTGGCGATCTCGGTGATGAATCAGTGGCCCGGGGTAAAGCTGCGGGTGACAGAGGGCTGGGACGAG…
XM_027749906.1	Pipra_filicauda	SHH	ATGGACGAAATGCTGCTGTTGACAAGAATTCTCTTGGTGGGCTTCATCTGCGCTCTTTTAGTCTCCTCTGGGCTGACTTGTGGACCAGGCAGGGGCATTGGAAAAAGGAGGCACCCCAAAAAGCTGACCCCTTTAGCCTATAAGCAGTTTATTCCCAATGTGGCAGAGAAGACCCTAGGGGCCAGTGGAAGATATGAAGGGAAGATCACAAGAAACTCCGAGAGATTTAAAGAACTAACCCCAAATTACAACCCTGACATTATTTTTAAGGATGAAGAGAACACGGGAGCTGACAGACTGATGACTCAGCGCTGCAAGGACAAACTGAACGCCCTGGCGATCTCGGTGATGAACCAGTGGCCCGGCGTAAAGCTGCGGGTTACCGAAGGATGGGATGAG…
XM_015853028.1	Coturnix_japonica	SHH	ATGGACGAAATGCTGCTGTTGACAAGAATTCTCTTGGTGGGCTTCATCTGCGCTCTTTTAGTCTCCTCTGGGCTGACTTGTGGACCAGGCAGGGGCATTGGAAAAAGGAGGCACCCCAAAAAGCTGACCCCGTTAGCCTATAAGCAGTTTATTCCCAATGTGGCAGAGAAGACCCTAGGGGCCAGTGGAAGATATGAAGGGAAGATCACAAGAAACTCCGAGAGATTTAAAGAACTAACCCCAAATTACAACCCTGACATTATTTTTAAGGATGAAGAGAACACGGGAGCTGACAGACTGATGACTCAGCGCTGCAAGGACAAGTTGAACTCCCTGGCCATCTCTGTGATGAACCAGTGGCCGGGGGTGAAGCTGCGGGTGACCGAGGGCTGGGACGAG…
NM_009170.3	Mus_musculus	SHH	ATGCTGCTGCTGCTGGCCAGATGTTTTCTGGTGATCCTTGCTTCCTCGCTGCTGGTGTGCCCCGGGCTGGCCTGTGGGCCCGGCAGGGGGTTTGGAAAGAGGCGGCACCCCAAAAAGCTGACCCCTTTAGCCTACAAGCAGTTTATTCCCAACGTAGCCGAGAAGACCCTAGGGGCCAGCGGCAGATATGAAGGGAAGATCACAAGAAACTCCGAACGATTTAAGGAACTCACCCCCAATTACAACCCCGACATCATATTTAAGGATGAGGAAAACACGGGAGCAGACCGGCTGATGACTCAGAGGTGCAAAGACAAGTTAAATGCCTTGGCCATCTCTGTGATGAACCAGTGGCCTGGAGTGAAGCTGCGAGTGACCGAGGGCTGGGATGAGGACGGC…
XM_845357.4	Canis_lupus_familiaris	SHH	ATGCTGCTGCTGGCGAGATGTATGCTGGCGGTGCTCGTCTGCGCACTGCTGATGTGCTCAGGGCTGGCGTGCGGACCCGGCAGGGGATTTGGGAAGAGGCGGCACCCCAAAAAGCTGACCCCTTTAGCCTACAAGCAGTTTATCCCCAACGTGGCGGAGAAGACCCTAGGGGCCAGTGGAAGATACGAAGGGAAGATCTCGAGAAACTCGGAGCGATTTAAGGAACTCACCCCCAATTACAACCCCGACATCATATTTAAGGATGAAGAAAACACGGGAGCAGACCGGCTGATGACTCAGAGGTGCAAGGACAAGCTGAACGCCTTGGCCATCTCGGTGATGAACCAGTGGCCCGGCGTGAAGCTGCGGGTGACGGAGGGCTGGGACGAGGACGGTCAC…
XM_024991301.1	Bos_taurus	SHH	ATGGACGAGATGCTGCTGCTGGCGAGATGTCTGCTGGTGCTGCTTGTCTCCTCGCTGTTGATGTGCTCGGGGCTGGCGTGCGGACCCGGCAGGGGATTTGGCAAGAGGCGGAACCCCAAAAAGCTGACCCCTTTAGCCTACAAGCAGTTTATCCCCAACGTGGCGGAGAAGACCCTAGGGGCCAGTGGAAGATATGAGGGGAAGATCACCAGAAACTCAGAGCGATTTAAGGAACTCACCCCCAATTACAACCCCGACATCATATTTAAGGATGAAGAAAACACTGGAGCGGACCGGCTGATGACTCAGAGGTGCAAGGACAAGCTGAACGCCTTAGCCATCTCCGTGATGAACCAGTGGCCGGGCGTGAAGCTGCGGGTGACCGAGGGCTGGGACGAG…
NM_001244513.1	Sus_scrofa	SHH	ATGCTGCTGCTGGCGAGATGCCTGCTGGTGATGCTCATCTCCTCCCTGCTCCTGTGCTCGGGGCTGGCGTGCGGACCCGGCAGGGGGTTCGGGAAGAGGCGGCACCCCAAAAAACTGACCCCTTTAGCCTACAAGCAGTTTATCCCCAACGTGGCGGAGAAGACCCTAGGGGCCAGCGGAAGATACGAAGGGAAGATTACACGAAACTCAGAGCGATTTAAGGAACTCACCCCCAATTACAACCCCGACATCATATTTAAGGATGAAGAAAACACTGGAGCCGACCGGCTGATGACTCAGAGATGCAAGGACAAGCTGAATGCCTTAGCCTTCTCCGTGATGAACCAGTGGCCCGGAGTGAAGCTGCGGGTGACCGAGGGCTGGGATGAGGACGGCCAC…
XM_027969062.1	Ovis_aries	SHH	ATGGGCGAGATGCTGCTGCTGGCGAGATGTCTGCTGGTGCTGCTGGTCTCCTCGCTGTTGATGTGCTCGGGGCTGGCGTGCGGACCCGGCAGGGGATTTGGCAAGAGGCGGAACCCCAAAAAGCTGACCCCTTTAGCCTACAAGCAGTTTATCCCCAACGTGGCGGAGAAGACGCTAGGGGCCAGTGGAAGATACGAGGGGAAGATCACCAGAAACTCAGAGCGATTTAAGGAACTCACCCCCAATTACAACCCCGACATCATATTTAAGGATGAAGAAAACACTGGAGCGGACCGGCTGATGACTCAGAGGTGCAAGGACAAGCTGAACGCCTTAGCCATCTCCGTGATGAACCAGTGGCCGGGCGTGAAGCTGCGGGTGACCGAGGGCTGGGACGAG…
XM_027727393.1	Pipra_filicauda	DHH	ATGCCCCGGTGGAGGCCGCTCGCCCTCGTCCTGCTCGGCCTCGCCGCCTGCCTGCTGGCCGCGCCGGTGCTGGGCTGCGGCCCGGGCCGGGGCCCGGTGGGGCGGCGGCGGCTGGGGCGGCGGCAGCTCTCGCCGCTGCTCTACAAGCAGTTCGTGCCCAACGTGCCCGAGCAGACGCTGGGGGCGAGCGGGAAGGCGGAGGGCAAAGTGCTGCGGGGCTCGGAGCGCTTCAGGGACCTGGTGCCCAACTACAACCCCGACATCATCTTCAAGGACGAGGAGAACACGGGGGCGGATCGGCTCATGACCGAGCGCTGCAAGGAGCGGGTGAACTCTCTGGCCATCGCGGTGATGAACATGTGGCCGGGGGTGAAGCTGCGGGTGACCGAGGGCTGGGAC…
XM_027909782.1	Empidonax_traillii	DHH	ATGCCCCGGTGGAGGCCGCTCGCCCTCGTCCTGCTCGGCCTCGCCGCCTGCCTGCTGGCCGCGCCGGTGCTGGGCTGTGGTCCGGGCCGGGGCCCGGTGGGGCGGCGGCGGTTGGGGCGGCGGCAGCTCTCACCGCTGCTCTACAAGCAGTTCGTGCCCAACGTGCCCGAGCAGACGCTGGGGGCGAGCGGGAAGGCGGAGGGCAAAGTGCTGCGGGGCTCGGAGCGCTTCAGGGACTTGGTGCCCAACTACAACCCCGACATCATCTTCAAGGACGAGGAGAACACGGGGGCGGATCGGCTCATGACCGAGCGCTGCAAGGAGCGGGTGAACTCTCTGGCCATCGCGGTGATGAACATGTGGCCGGGGGTGAAGCTGCGGGTGACGGAGGGCTGGGAC…
XM_015615637.2	Parus_major	DHH	ATGCCCCGGTGGAGGCCGCTCGCCCTCGTCCTGCTCGGGCTCGCCGCCTGCCTGCTGGCCGCGCCGGTGCTGGGCTGCGGCCCGGGTCGGGGTCCGGTGGGTCGGCGGCGGCTGGGGCGGCGGCAGCTTTCGCCTCTGCTCTACAAGCAGTTCGTGCCCAACGTGCCCGAGCAGACGCTGGGGGCGAGCGGGAAGGCGGAGGGCAAAGTGCTGCGGGGCTCGGAGCGCTTCAGGGACCTGGTGCCCAACTACAACCCCGACATCATCTTCAAGGACGAGGAGAACACGGGGGCGGACCGGCTCATGACCGAGCGCTGCAAGGAGCGTGTGAACTCGCTGGCCATCGCGGTGATGAACATGTGGCCGGGGGTGAAGCTGCGGGTGACAGAGGGCTGGGAT…
XM_021548285.1	Lonchura_striata	DHH	ATGCCCCGGTGGACGCCGCTCGCCCTCGTCCTGCTCGGGCTCGCCGCCTGCCTGCTGGCCGCGCCGGTGCTGGGCTGCGGCCCGGGTCGGGGCCCGGTGGGGCGGCGGCGGCTGGGGCGGCGGCAGCTTTCGCCTCTGCTCTACAAGCAGTTCGTGCCCAACGTGCCCGAGCAGACGCTGGGGGCGAGCGGGAAGGCGGAGGGCAAAGTGCTGCGGGGCTCGGAGCGCTTCAGGGACCTGGTGCCCAACTACAACCCCGACATCATCTTCAAGGACGAGGAGAACACGGGGGCGGACCGGCTCATGACCGAGCGCTGCAAGGAGCGTGTGAACTCGCTGGCCATCGCGGTGATGAACATGTGGCCGGGGGTGAAGCTGCGGGTGACGGAGGGCTGGGAT…
XM_027668537.1	Corapipo_altera	DHH	ATGCCCCGGTGGAGGCCGCTCGCCCTCGTCCTGCTCGGCCTCGCCGCCTGCCTGCTGGCCGCGCCGGTGCTGGGCTGCGGCCCGGGCCGGGGCCCGGTGGGGCGGCGGCGGCTGGGGCGGCGGCAGCTCTCGCCGCTGCTCTACAAGCAGTTCGTGCCCAACGTGCCCGAGCAGACGCTGGGGGCGAGCGGGAAGGCGGAGGGCAAAGTGCTGCGGGGCTCGGAGCGCTTCAGGGACCTGGTGCCCAACTACAACCCCGACATCATCTTCAAGGACGAGGAGAACACGGGGGCGGATCGGCTCATGACCGAGCGCTGCAAGGAGCGGGTGAACTCTCTGGCCATCGCGGTGATGAACATGTGGCCGGGGGTGAAGCTGCGGGTGACTGAGGGCTGGGAC…
XM_017836612.1	Lepidothrix_coronata	DHH	ATGCCCCGGTGGAGGCCGCTCGCCCTCGTCCTGCTCGGCCTCGCCGCCTGCCTGCTGGCCGCGCCGGTGCTGGGCTGCGGCCCGGGCCGGGGCCCGGTGGGGCGGCGGCGGCTGGGGCGGCGGCAGCTCTCGCCGCTGCTCTACAAGCAGTTCGTGCCCAACGTGCCCGAGCAGACGCTGGGGGCGAGCGGGAAGGCGGAGGGCAAAGTGCTGCGGGGCTCGGAGCGCTTCAGGGACCTGGTGCCCAACTACAACCCCGACATCATCTTCAAGGACGAGGAGAACACGGGGGCGGATCGGCTCATGACCGAGCGCTGCAAGGAGCGGGTGAACTCTCTGGCCATCGCGGTGATGAACATGTGGCCGGGGGTGAAGCTGCGGGTGACAGAGGGCTGGGAC…
NM_007857.5	Mus_musculus	DHH	ATGGCTCTGCCGGCCAGTCTGTTGCCCCTGTGCTGCTTGGCACTCTTGGCACTATCTGCCCAGAGCTGCGGGCCGGGCCGAGGACCGGTTGGCCGGCGGCGTTATGTGCGCAAGCAACTTGTGCCTCTGCTATACAAGCAGTTTGTGCCCAGTATGCCCGAGCGGACCCTGGGCGCGAGTGGGCCAGCGGAGGGGAGGGTAACAAGGGGGTCGGAGCGCTTCCGGGACCTCGTACCCAACTACAACCCCGACATAATCTTCAAGGATGAGGAGAACAGCGGCGCAGACCGCCTGATGACAGAGCGTTGCAAAGAGCGGGTGAACGCTCTAGCCATCGCGGTGATGAACATGTGGCCCGGAGTACGCCTACGTGTGACTGAAGGCTGGGACGAGGACGGC…
XM_002687306.5	Bos_taurus	DHH	ATGGCGCTGCCGGCCAGTCTGGTGCCCCTGTGCTGCTTGGCACTTCTGGCGCTGCCGGCTCAGAGCTGCGGGCCGGGCCGGGGACCGGTCGGCCGGCGCCGCTATGTGCGCAAACAGCTCGTGCCGCTGCTCTACAAGCAGTTTGTGCCCAGCGTGCCTGAGCGGACCCTGGGCGCCAGTGGGCCAGCTGAGGGGAGGGTGACAAGAGGTTCTGAGCGCTTCCGGGACCTGGTGCCTAACTACAACCCCGACATCATCTTCAAGGATGAGGAGAACAGTGGTGCAGACCGCCTGATGACCGAGCGTTGTAAGGAGCGGGTGAACGCGCTGGCCATAGCCGTGATGAACATGTGGCCCGGAGTGCGCCTACGGGTGACCGAGGGCTGGGACGAGGACGGC…
XM_013988251.1	Sus_scrofa	DHH	ATGGCACTGCCGGCCAGTTTGGTGCCCCTGTGCTGCTTGGCACTTCTGGCGCTGCCGGCCCAGAGCTGCGGCCCGGGCCGGGGGCCGGTTGGCCGGCGCCGCTACGTGCGCAAGCAGCTCGTGCCGCTGCTCTACAAGCAATTTGTGCCTAGCGTGCCCGAGCGGACCCTGGGCGCCAGTGGGCCGGCCGAGGGAAGGGTGACAAGGGGCTCTGAGCGCTTCCGGGACCTGGTGCCTAACTACAACCCCGACATCATCTTCAAGGATGAGGAGAACAGTGGTGCAGACCGCCTGATGACCGAGCGGTGTAAGGAGCGGGTAAACGCACTGGCCATTGCGGTGATGAACATGTGGCCTGGAGTACGCCTACGGGTGACCGAAGGCTGGGACGAGGACGGC…
XM_027967382.1	Ovis_aries	DHH	ATGGCGCTGCCGGCCAGTCTGGTGCCTCTGTGCTGCTTGGCACTTCTGGCGCTGCCGGCTCAGAGCTGCGGGCCTGGCCGGGGACCCGTCGGCCGGCGCCGCTACGTGCGCAAACAGCTCGTGCCGCTGCTCTACAAGCAATTTGTGCCCAGCGTGCCCGAGCGGACCCTGGGTGCCAGTGGGCCGGCTGAGGGAAGGGTGACAAGAGGTTCTGAGCGCTTCCGGGACCTGGTGCCTAACTACAACCCCGACATCATCTTCAAGGATGAGGAGAACAGTGGCGCAGACCGCCTGATGACCGAGCGTTGTAAGGAGCGGGTGAACGCGCTGGCCATAGCCGTGATGAACATGTGGCCCGGAGTGCGCCTACGGGTGACCGAGGGCTGGGACGAGGACGGC…
XM_003988641.5	Felis_catus	DHH	ATGGCGCTGCCGGCCAGGCTGGTGCCCCTGTGCTGCTTGGCGCTTCTGGCGCTGCCTGCCCAGAGCTGCGGGCCGGGCCGGGGACCGGTTGGCCGGCGCCGCTACGTGCGCAAGCAGCTCGTGCCGTTGCTCTACAAGCAATTTGTGCCCAGCATGCCCGAGCGGACCCTAGGCGCCAGTGGGCCGGCAGAGGGGAGAGTGGCAAGGGGCTCCGAGCGCTTCCGGGACCTGGTGCCCAACTACAACCCGGACATCATCTTCAAGGATGAGGAGAACAGTGGTGCAGACCGCCTGATGACGGAGCGCTGTAAGGAGCGGGTGAACGCGCTGGCCATTGCCGTGATGAACATGTGGCCCGGAGTGCGCCTACGGGTGACCGAGGGCTGGGACGAAGATGGC…
NM_204957.2	Gallus_gallus	IHH	ATGAAGCCGGCGCGGCTGCTGCTGCTGCTGAGCGGGTGCGCGCTGCTGCTGGCGCCGGCCGTGCGCTGCTGCGGGCCGGGCAGGGTTGTGGGCAGCCGCCGCCGGCCGCCCCGCAAGCTCATCCCGCTCGCCTACAAGCAGTTCAGCCCCAACGTGCCCGAGAAGACGCTGGGGGCCAGCGGGCGCTACGAGGGCAAGATCGCGCGGAACTCGGAGCGCTTCAAGGAGCTCACGCCCAACTACAACCCCGACATCATCTTCAAGGACGAGGAGAACACCGGCGCCGACCGGCTCATGACCCAGCGCTGCAAGGACCGCCTGAACTCCCTGGCCATCTCCGTCATGAACCAGTGGCCGGGGGTGAAGCTGCGGGTGACGGAGGGCTGGGATGAGGACGGC…
XM_015869227.1	Coturnix_japonica	IHH	ATGAAGCCGGCGCGGCTGCTGCTGCTGCTGAGCGGGTGCGCGCTGCTGCTGGCGCCCGCCGTGCGCGGCTGCGGGCCGGGCAGGGTCGTGGGCAGCCGCCGCCGGCCGCCCCGCAAGCTCATCCCGCTCGCCTACAAGCAGTTCAGCCCCAACGTGCCCGAGAAGACGCTGGGGGCCAGCGGGCGCTACGAGGGCAAGATCGCGCGGAACTCGGAGCGCTTCAAGGAGCTCACGCCCAACTACAACCCCGACATCATCTTCAAGGACGAGGAGAACACCGGCGCCGACCGGCTCATGACCCAGCGCTGCAAGGACCGCCTGAACTCCCTGGCCATCTCCGTGATGAACCAGTGGCCGGGGGTGAAGCTGCGGGTGACCGAGGGCTGGGATGAGGACGGC…
XM_021399222.1	Numida_meleagris	IHH	ATGAAGCCGGCGCGGCTGCTCCTGCTGCTGAGCGGGTGCGCGCTGCTGCTGGCGCCGGCCGTGCGCGGCTGCGGGCCGGGCAGGGTAGTGGGCAGCCGCCGCCGGCCGCCCCGCAAGCTCATCCCGCTCGCCTACAAGCAGTTCAGCCCCAACGTGCCCGAGAAGACGCTGGGTGCCAGCGGGCGCTACGAGGGCAAGATCGCGCGGAACTCGGAGCGCTTCAAGGAGCTCACGCCCAACTACAACCCCGACATCATCTTCAAGGACGAGGAGAACACCGGCGCCGACCGGCTCATGACCCAGCGCTGCAAGGACCGCCTGAACTCCCTGGCCATCTCTGTCATGAACCAGTGGCCGGGGGTGAAGCTGCGGGTGACGGAGGGCTGGGACGAGGACGGC…
XM_027734760.1	Pipra_filicauda	IHH	ATGAAGCCGGCGCGGCTGCTGCTGCTGCTGAGCGGGTGCGCGCTGCTACTGACGCCGGCCGTGCGCGGCTGCGGGCCGGGCAGGGTGGTGGGCAGCCGCCGCCGCCCGCCCCGCAAGCTCATCCCGCTCGCCTACAAGCAGTTCAGCCCCAACGTCCCCGAGAAGACGCTGGGGGCCAGCGGCCGCTACGAGGGCAAGATCGCGCGTAACTCGGAGCGCTTCAAGGAGCTCACGCCCAACTACAACCCCGACATCATCTTCAAGGACGAGGAGAATACCGGCGCCGACCGGCTTATGACCCAGCGCTGCAAGGACCGCTTGAACTCCCTGGCCATCTCTGTCATGAATCAGTGGCCAGGGGTGAAGCTGAGGGTGACAGAAGGCTGGGATGAGGATGGG…
XM_027879033.1	Empidonax_traillii	IHH	ATGAAGCCGGCGCGGCTGCTGCTGCTGCTGAGCGGGTGCGCGCTGCTGCTGGCGCCGGCCGTGCGCGGCTGCGGGCCGGGCAGGGTGGTGGGCAGCCGCCGCCGCCCGCCCCGCAAGCTCATCCCGCTCGCCTACAAACAGTTCAGCCCCAACGTCCCCGAGAAGACGTTGGGGGCCAGCGGCCGCTACGAGGGCAAGATCGCGCGTAACTCGGAGCGCTTCAAGGAGCTCACGCCCAACTACAACCCCGACATCATCTTCAAGGACGAAGAGAATACCGGCGCCGACCGGCTTATGACCCAGCGCTGCAAGGACCGCTTGAACTCCCTGGCCATCTCTGTCATGAATCAGTGGCCAGGGGTGAAGCTGAGGGTGACGGAGGGCTGGGATGAGGATGGG…
XM_027678824.1	Neopelma_chrysocephalum	IHH	ATGAAGCCGGCACGGCTGCTGCTGCTGCTGAGCGGGTGCGCGCTGCTACTGGCGCCGGCCGTGCGCGGCTGCGGGCCGGGCAGGGTGGTGGGCAGCCGCCGCCGCCCGCCCCGCAAGCTCATCCCGCTCGCCTATAAGCAGTTCAGCCCCAACGTCCCCGAGAAGACGCTGGGGGCCAGCGGCCGCTACGAGGGCAAGATCGCGCGTAACTCGGAGCGCTTCAAGGAGCTCACGCCCAACTATAACCCCGACATCATCTTCAAGGACGAGGAGAATACCGGCGCCGACCGGCTTATGACCCAGCGCTGCAAAGACCGCTTGAACTCCCTGGCCATCTCTGTCATGAATCAGTGGCCGGGGGTGAAGCTGAGGGTGACGGAGGGCTGGGATGAAGATGGG…
NM_001244470.1	Sus_scrofa	IHH	ATGTCTCCCGCCCGGCTCCGGCCCCGACTGCGGTTCTGCCTGCTGCTGCTGCTGCTGCTGGTGCCGGCGGCTCGGGGCTGCGGGCCGGGCCGGGTGGTGGGCAGTCGCCGGCGGCCTCCGCGCAAGCTCGTGCCGCTCGCGTACAAGCAGTTCAGCCCCAATGTGCCGGAGAAGACCCTGGGCGCCAGCGGGCGCTATGAAGGCAAGATCGCGCGCAGCTCGGAGCGCTTCAAGGAGCTCACCCCTAACTACAATCCCGATATCATCTTCAAGGACGAGGAGAACACCGGCGCCGACCGCCTCATGACCCAGCGCTGCAAGGACCGCCTGAACTCGCTGGCCATCTCGGTGATGAACCAGTGGCCTGGGGTGAAGCTGCGGGTGACCGAGGGCTGGGAC…
XM_023642369.1	Equus_caballus	IHH	ATGTCTCCCGCCCGGCTCCGGCCCCGCCTGCGGTTCTGCCTGCTCCTGCTGCTGCTGCTGGTGCCGGCGGCGCGGGGCTGCGGGCCGGGCCGGGTGGTGGGCAGCCGCCGGCGGCCGCCGCGCAAGCTCGTGCCGCTCGCCTACAAGCAGTTCAGCCCCAACGTGCCCGAGAAGACCCTGGGCGCCAGCGGGCGCTATGAAGGCAAGATCGCGCGCAGCTCTGAGCGCTTCAAGGAGCTCACCCCCAACTACAATCCCGACATCATCTTCAAGGACGAGGAGAACACGGGCGCCGACCGCCTCATGACCCAGCGCTGCAAGGACCGCCTGAACTCGCTGGCCATCTCGGTAATGAACCAGTGGCCCGGAGTGAAGCTGCGAGTGACCGAGGGCTGGGAC…
XM_008259184.2	Oryctolagus_cuniculus	IHH	ATGTCTCCCGCCCGGCTCCGGCCCCGACTGCGGTTCTGCCTGCTCCTGCTGCTGCTGCTGGTGCCGGCGGCACGGGGCTGCGGGCCGGGCCGGGTGGTGGGCAGCCGCCGGCGGCCGCCGCGCAAACTCGTGCCGCTCGCCTACAAGCAGTTCAGCCCCAACGTGCCCGAGAAGACGCTGGGCGCCAGCGGGCGCTATGAAGGCAAGATCGCGCGCAGCTCGGAGCGCTTCAAGGAGCTCACTCCCAACTACAATCCCGACATCATCTTCAAGGACGAGGAGAACACGGGCGCCGACCGCCTCATGACCCAGCGCTGCAAGGACCGCCTGAACTCGCTGGCCATCTCCGTGATGAACCAGTGGCCCGGCGTGAAGCTGCGGGTGACTGAAGGCTGGGAC…
XM_004864562.3	Heterocephalus_glaber	IHH	ATGTCTCCCGCCCGGCTCCGGCCCCGACTGCGGTTCTGCCTCCTCCTGCTACTGCTACTGGTGCCCGCTGCACGGGGCTGCGGGCCGGGCCGGGTGGTGGGTGGCCGCCGGCGGCCGCCGCGCAAACTCGTGCCGCTCGCCTACAAGCAGTTCAGCCCCAACGTGCCCGAGAAGACCCTCGGCGCCAGCGGGCGCTATGAAGGCAAGATCGCGCGCAGCTCCGAGCGCTTCAAGGAGCTCACCCCCAACTACAACCCCGACATCATCTTCAAGGACGAGGAGAACACGGGTGCCGACCGCCTCATGACCCAGCGCTGCAAGGACCGGCTGAATTCGCTGGCCATCTCGGTCATGAATCAGTGGCCCGGCGTGAAGCTGCGGGTGACCGAAGGCTGGGAT…
XM_027588047.1	Zalophus_californianus	IHH	ATGTCTCCCGCCCGGCTCCGGCCCCGACTGCGGTTCTGCCTGCTCCTGCTGCTGCTGCTGGTGCCGGCGGCGCGGGGCTGCGGGCCGGGCCGGGTGGTGGGCAGCCGGCGGCGGCCGCCGCGCAAGCTTGTGCCGCTCGCCTACAAGCAGTTCAGCCCGAACGTGCCCGAGAAGACCCTGGGCGCCAGCGGGCGCTATGAAGGCAAGATCGCGCGCAGCTCGGAGCGCTTCAAAGAGCTCACCCCCAACTACAATCCCGACATCATCTTCAAGGACGAGGAGAATACGGGCGCCGACCGCCTCATGACCCAGCGCTGCAAGGACCGCCTGAACTCGCTGGCCATCTCGGTGATGAACCAGTGGCCCGGCGTGAAGCTGCGAGTGACCGAAGGCTGGGAC…
