# Supplementary material for: Comparative and evolutionary analysis of the reptilian hedgehog gene family (Shh, Dhh, and Ihh)
Source: PeerJ. 2019 Aug 30;7:e7613. doi: 10.7717/peerj.7613 (PMC6718155; doi:10.7717/peerj.7613)
Supplement: Supplemental Information 5 [file peerj-07-7613-s005.xlsx]

## Sheet: Sheet1
Sequence percent identity matrixof Shh
		100
	Anolis carolinensis	Alligator mississippiensis	Alligator sinensis	Chelonoidis abingdonii	Cuora mccordi	Chrysemys picta bellii	Crocodylus porosus	Crotalus pyrrhus	Crotalus viridis	Gopherus agassizii	Gavialis gangeticus	Gekko japonicus	Hydrophis cyanocinctus	Hydrophis_hardwickii	Lacerta bilineata	Lacerta viridis	Malaclemys terrapin	Notechis scutatus	Ophiophagus hannah	Ophisaurus gracilis	Python_bivittatus	Protobothrops flavoviridis	Pantherophis guttatus	Platysternon megacephalum	Protobothrops mucrosquamatus	Paroedura picta	Pseudonaja textilis	Pogona vitticeps	Salvator merianae	Thermophis baileyi	Terrapene mexicana triunguis	Thamnophis sirtalis	Vipera berus
Anolis carolinensis	100	67.6	67.3	70.7	70.6	70.1	67.7	77.5	77.5	70.5	67.9	80.2	77.4	77.4	80.3	80.2	70.6	77.4	81.2	78	79.7	78	76.5	70.1	78.1	77.7	77.4	79.9	79.1	78.4	70.3	77.5	76.8
Alligator mississippiensis	67.6	100	99.2	86.1	86.7	87.2	98.2	70.6	70.6	87	98	72.3	71.6	71.6	74	73.4	86.3	71.8	74	71.7	72.2	70.8	70	86.7	71.2	68.2	71.5	70.8	71.2	71.8	86.8	71.5	70.6
Alligator sinensis	67.3	99.2	100	86.3	86.9	87.3	98	70.8	70.8	87.1	97.9	72.4	71.5	71.5	73.9	73.4	86.5	71.7	73.9	71.8	71.9	70.7	69.9	86.9	71.1	68.3	71.4	70.8	71.3	71.8	87	71.6	70.5
Chelonoidis abingdonii	70.7	86.1	86.3	100	97.4	97.2	86.6	73	73	98.2	86.2	73.9	73.5	73.5	76.2	75.6	98.5	73.8	75.8	73.7	74	72.9	71.9	96.9	73.1	70.1	73.7	71.9	73.4	73.8	97	73.6	72.6
Cuora mccordi	70.6	86.7	86.9	97.4	100	97.2	87.1	72.8	72.8	97.7	86.7	74.2	73.3	73.3	76.3	75.7	97.6	73.6	75.2	73.5	73.9	72.7	71.6	97.2	72.9	70.1	73.4	71.9	73	73.4	97.2	73.6	72.3
Chrysemys picta bellii	70.1	87.2	87.3	97.2	97.2	100	87.6	72.7	72.7	97.7	87.3	73.8	73.3	73.2	76	75.4	98.7	73.6	75.5	73.5	73.7	72.6	71.6	99.2	72.8	70	73.4	71.7	73.4	73.5	99.3	73.4	72.1
Crocodylus porosus	67.7	98.2	98	86.6	87.1	87.6	100	71.2	71.2	87.4	99	72.5	72	72	74.1	73.5	86.7	72.2	73.9	72.4	72.3	71.2	70.3	87.1	71.5	68.5	72	70.6	71.2	72.2	87.2	72.1	70.9
Crotalus pyrrhus	77.5	70.6	70.8	73	72.8	72.7	71.2	100	100	73.1	71.2	81.8	95.3	95	83.8	83.1	73	95.6	84.4	95.5	93	98.5	94.2	72.5	98.8	78.8	95.6	81.8	81.8	96.8	72.4	95.6	96.8
Crotalus viridis	77.5	70.6	70.8	73	72.8	72.7	71.2	100	100	73.1	71.2	81.8	95.3	95	83.8	83.1	73	95.6	84.4	95.5	93	98.5	94.2	72.5	98.8	78.8	95.6	81.8	81.8	96.8	72.4	95.6	96.8
Gopherus agassizii	70.5	87	87.1	98.2	97.7	97.7	87.4	73.1	73.1	100	87	73.8	73.7	73.7	76.3	75.7	98	74	75.7	73.9	74.2	73	72	97.7	73.2	70	73.8	72.1	73.5	73.9	97.8	73.7	72.6
Gavialis gangeticus	67.9	98	97.9	86.2	86.7	87.3	99	71.2	71.2	87	100	72.6	72	72	74.1	73.5	86.4	72.2	73.8	72.4	72.6	71.2	70.3	86.8	71.6	68.3	71.9	70.6	71.5	72.4	86.9	72.2	71
Gekko japonicus	80.2	72.3	72.4	73.9	74.2	73.8	72.5	81.8	81.8	73.8	72.6	100	81.5	81.4	84.6	85	74.2	81.9	86.2	81.7	83.3	81.7	80.4	73.3	81.9	87.5	81.7	84.3	82.8	82.6	73.3	81.8	80.7
Hydrophis cyanocinctus	77.4	71.6	71.5	73.5	73.3	73.3	72	95.3	95.3	73.7	72	81.5	100	99.6	83.6	83.1	73.7	99.2	84.5	97.5	92.2	94.9	94.2	73.1	95.3	79	98.8	82.2	82	96.7	73	95.4	94.3
Hydrophis_hardwickii	77.4	71.6	71.5	73.5	73.3	73.2	72	95	95	73.7	72	81.4	99.6	100	83.2	82.8	73.6	98.9	84.3	97.4	92.1	94.7	94	73	95.1	79	98.5	82.1	81.8	96.4	72.9	95.1	94.3
Lacerta bilineata	80.3	74	73.9	76.2	76.3	76	74.1	83.8	83.8	76.3	74.1	84.6	83.6	83.2	100	98.6	76.4	83.9	88.7	83.4	84.6	84	82.4	75.6	84.2	80.5	83.6	85	85.3	84.3	75.5	83.4	83
Lacerta viridis	80.2	73.4	73.4	75.6	75.7	75.4	73.5	83.1	83.1	75.7	73.5	85	83.1	82.8	98.6	100	75.8	83.4	89.2	83	84.2	83.2	81.8	75	83.4	80.8	83.1	85.4	86.1	83.8	74.9	82.9	82.3
Malaclemys terrapin	70.6	86.3	86.5	98.5	97.6	98.7	86.7	73	73	98	86.4	74.2	73.7	73.6	76.4	75.8	100	74	75.9	73.9	74.1	73	72	98.1	73.2	70.4	73.8	72.1	73.7	73.9	98.2	73.8	72.5
Notechis scutatus	77.4	71.8	71.7	73.8	73.6	73.6	72.2	95.6	95.6	74	72.2	81.9	99.2	98.9	83.9	83.4	74	100	84.8	97.8	92.4	95.2	94.6	73.4	95.6	79	99.1	82.6	81.9	97.1	73.3	95.7	94.6
Ophiophagus hannah	81.2	74	73.9	75.8	75.2	75.5	73.9	84.4	84.4	75.7	73.8	86.2	84.5	84.3	88.7	89.2	75.9	84.8	100	84.6	86.3	84.5	83.3	74.9	84.7	81.9	84.8	85.4	86.7	84.9	74.9	84.1	83.5
Ophisaurus gracilis	78	71.7	71.8	73.7	73.5	73.5	72.4	95.5	95.5	73.9	72.4	81.7	97.5	97.4	83.4	83	73.9	97.8	84.6	100	92.9	95.4	94.6	73.3	95.8	78.5	97.8	82.2	81.7	97.3	73.3	96.6	94.8
Python_bivittatus	79.7	72.2	71.9	74	73.9	73.7	72.3	93	93	74.2	72.6	83.3	92.2	92.1	84.6	84.2	74.1	92.4	86.3	92.9	100	93.2	91.3	73.4	93.5	79.5	92.4	82.9	82.9	94	73.4	92.8	92.1
Protobothrops flavoviridis	78	70.8	70.7	72.9	72.7	72.6	71.2	98.5	98.5	73	71.2	81.7	94.9	94.7	84	83.2	73	95.2	84.5	95.4	93.2	100	93.9	72.4	99.3	78.6	95.3	81.8	81.7	96.7	72.3	95.3	97.2
Pantherophis guttatus	76.5	70	69.9	71.9	71.6	71.6	70.3	94.2	94.2	72	70.3	80.4	94.2	94	82.4	81.8	72	94.6	83.3	94.6	91.3	93.9	100	71.3	94.3	76.9	94.3	80.6	81.1	96.2	71.3	94.7	93
Platysternon megacephalum	70.1	86.7	86.9	96.9	97.2	99.2	87.1	72.5	72.5	97.7	86.8	73.3	73.1	73	75.6	75	98.1	73.4	74.9	73.3	73.4	72.4	71.3	100	72.6	69.6	73.2	71.7	73	73.3	99.6	73.1	71.9
Protobothrops mucrosquamatus	78.1	71.2	71.1	73.1	72.9	72.8	71.5	98.8	98.8	73.2	71.6	81.9	95.3	95.1	84.2	83.4	73.2	95.6	84.7	95.8	93.5	99.3	94.3	72.6	100	78.8	95.7	81.9	81.8	97.1	72.5	95.6	97.5
Paroedura picta	77.7	68.2	68.3	70.1	70.1	70	68.5	78.8	78.8	70	68.3	87.5	79	79	80.5	80.8	70.4	79	81.9	78.5	79.5	78.6	76.9	69.6	78.8	100	78.8	80.7	79.1	78.9	69.6	77.9	78.2
Pseudonaja textilis	77.4	71.5	71.4	73.7	73.4	73.4	72	95.6	95.6	73.8	71.9	81.7	98.8	98.5	83.6	83.1	73.8	99.1	84.8	97.8	92.4	95.3	94.3	73.2	95.7	78.8	100	82.4	81.9	97.1	73.2	95.7	94.7
Pogona vitticeps	79.9	70.8	70.8	71.9	71.9	71.7	70.6	81.8	81.8	72.1	70.6	84.3	82.2	82.1	85	85.4	72.1	82.6	85.4	82.2	82.9	81.8	80.6	71.7	81.9	80.7	82.4	100	83	82.5	71.6	81.6	80.9
Salvator merianae	79.1	71.2	71.3	73.4	73	73.4	71.2	81.8	81.8	73.5	71.5	82.8	82	81.8	85.3	86.1	73.7	81.9	86.7	81.7	82.9	81.7	81.1	73	81.8	79.1	81.9	83	100	82.5	73	81.8	80.9
Thermophis baileyi	78.4	71.8	71.8	73.8	73.4	73.5	72.2	96.8	96.8	73.9	72.4	82.6	96.7	96.4	84.3	83.8	73.9	97.1	84.9	97.3	94	96.7	96.2	73.3	97.1	78.9	97.1	82.5	82.5	100	73.2	97.2	95.8
Terrapene mexicana triunguis	70.3	86.8	87	97	97.2	99.3	87.2	72.4	72.4	97.8	86.9	73.3	73	72.9	75.5	74.9	98.2	73.3	74.9	73.3	73.4	72.3	71.3	99.6	72.5	69.6	73.2	71.6	73	73.2	100	73.3	71.8
Thamnophis sirtalis	77.5	71.5	71.6	73.6	73.6	73.4	72.1	95.6	95.6	73.7	72.2	81.8	95.4	95.1	83.4	82.9	73.8	95.7	84.1	96.6	92.8	95.3	94.7	73.1	95.6	77.9	95.7	81.6	81.8	97.2	73.3	100	94
Vipera berus	76.8	70.6	70.5	72.6	72.3	72.1	70.9	96.8	96.8	72.6	71	80.7	94.3	94.3	83	82.3	72.5	94.6	83.5	94.8	92.1	97.2	93	71.9	97.5	78.2	94.7	80.9	80.9	95.8	71.8	94	100
Sequence percent identity matrixof Dhh
	Anolis carolinensis	Chrysemys picta bellii	Crotalus_horridus	Crotalus_pyrrhus	Crotalus_viridis	Cuora mccordi	Gekko japonicus	Gopherus_agassizii	Hydrophis_cyanocinctus	Hydrophis hardwickii	Malaclemys_terrapin	Notechis scutatus	Ophisaurus_gracilis	Pantherophis_guttatus	Paroedura_picta	Platysternon_megacephalum	Pogona vitticeps	Protobothrops_flavoviridis	Protobothrops mucrosquamatus	Pseudonaja textilis	Python bivittatus	Terrapene mexicana triunguis	Thamnophis_sirtalis	Thermophis_baileyi	Vipera_berus
Anolis carolinensis	100	73.2	76.5	76.3	76.4	74.1	78.3	74.1	75.4	75.4	73.3	75.9	79.8	76.1	75.8	73.1	79.6	76.4	76.1	75.6	78.2	73.3	75.4	76	76.4
Chrysemys picta bellii	73.2	100	71.4	71.1	71.1	95.5	74.9	95.1	72.2	72.3	98.3	72.6	74.7	72	75.4	95.4	73.4	71.5	71.5	72.6	72	98.1	72	72.3	71
Crotalus_horridus	76.5	71.4	100	99.1	98.8	71.8	76.3	72	93.4	93.4	71.4	93.6	79.2	93.9	74.2	70.9	77	98.2	97.9	93.6	91.4	71.3	92.6	94.3	97
Crotalus_pyrrhus	76.3	71.1	99.1	100	99.4	71.5	75.9	71.8	93	93	71.1	93.1	78.7	93.7	73.7	70.6	76.8	97.9	97.6	93.1	91.2	71	92.4	94.1	96.7
Crotalus_viridis	76.4	71.1	98.8	99.4	100	71.6	76.2	71.8	93.3	93.3	71.1	93.4	78.8	94	73.7	70.6	77.2	97.8	97.5	93.4	91.4	71	92.6	94.3	96.8
Cuora mccordi	74.1	95.5	71.8	71.5	71.6	100	74.9	96.5	72.5	72.6	94.9	72.9	75.3	72.2	74.7	95	74.6	71.8	71.6	72.9	72.6	96	72.5	72.8	71.4
Gekko japonicus	78.3	74.9	76.3	75.9	76.2	74.9	100	74.4	76.7	76.7	74.2	76.9	81.2	77.1	88.9	74.3	78	76.9	76.5	76.9	77.6	74.9	76.8	77.1	76.4
Gopherus_agassizii	74.1	95.1	72	71.8	71.8	96.5	74.4	100	72.6	72.7	94.7	73	75.2	72.4	74.3	94.2	73.8	72.1	71.8	73	72.2	95.2	72.7	72.9	71.5
Hydrophis_cyanocinctus	75.4	72.2	93.4	93	93.3	72.5	76.7	72.6	100	99.8	72.1	99	79.1	96.1	74.5	71.6	77	93.7	93.7	98.8	92.2	71.9	94.8	96.4	93.4
Hydrophis hardwickii	75.4	72.3	93.4	93	93.3	72.6	76.7	72.7	99.8	100	72.2	99	79.1	96.1	74.5	71.7	76.9	93.7	93.7	98.8	92.2	72	94.8	96.4	93.4
Malaclemys_terrapin	73.3	98.3	71.4	71.1	71.1	94.9	74.2	94.7	72.1	72.2	100	72.5	74.5	71.8	75	94.9	73.3	71.5	71.5	72.4	71.9	97.1	72	72.2	71.1
Notechis scutatus	75.9	72.6	93.6	93.1	93.4	72.9	76.9	73	99	99	72.5	100	79.4	96.3	74.6	72	77.1	93.8	93.8	99	92	72.3	94.6	96.4	93.4
Ophisaurus_gracilis	79.8	74.7	79.2	78.7	78.8	75.3	81.2	75.2	79.1	79.1	74.5	79.4	100	78.8	78.6	73.9	82.4	79.4	79.3	79.6	80.5	74.7	78.7	79.1	79
Pantherophis_guttatus	76.1	72	93.9	93.7	94	72.2	77.1	72.4	96.1	96.1	71.8	96.3	78.8	100	74.4	71.1	77.4	94.6	94.7	96.3	92.3	71.5	95.9	97.5	94.5
Paroedura_picta	75.8	75.4	74.2	73.7	73.7	74.7	88.9	74.3	74.5	74.5	75	74.6	78.6	74.4	100	74	76.1	74.6	74.4	74.5	75.5	75.1	74.7	74.9	74
Platysternon_megacephalum	73.1	95.4	70.9	70.6	70.6	95	74.3	94.2	71.6	71.7	94.9	72	73.9	71.1	74	100	73.1	71	70.9	71.9	71.2	95.8	71.6	71.8	70.6
Pogona vitticeps	79.6	73.4	77	76.8	77.2	74.6	78	73.8	77	76.9	73.3	77.1	82.4	77.4	76.1	73.1	100	77.3	77.4	77.2	78	73.5	76.7	77.5	77.8
Protobothrops_flavoviridis	76.4	71.5	98.2	97.9	97.8	71.8	76.9	72.1	93.7	93.7	71.5	93.8	79.4	94.6	74.6	71	77.3	100	98.7	93.8	91.3	71.4	93	94.8	97.6
Protobothrops mucrosquamatus	76.1	71.5	97.9	97.6	97.5	71.6	76.5	71.8	93.7	93.7	71.5	93.8	79.3	94.7	74.4	70.9	77.4	98.7	100	93.9	91.6	71.4	93.2	95	97.8
Pseudonaja textilis	75.6	72.6	93.6	93.1	93.4	72.9	76.9	73	98.8	98.8	72.4	99	79.6	96.3	74.5	71.9	77.2	93.8	93.9	100	91.9	72.1	94.9	96.7	93.5
Python bivittatus	78.2	72	91.4	91.2	91.4	72.6	77.6	72.2	92.2	92.2	71.9	92	80.5	92.3	75.5	71.2	78	91.3	91.6	91.9	100	71.9	91.8	92.6	91.3
Terrapene mexicana triunguis	73.3	98.1	71.3	71	71	96	74.9	95.2	71.9	72	97.1	72.3	74.7	71.5	75.1	95.8	73.5	71.4	71.4	72.1	71.9	100	71.8	72.2	70.9
Thamnophis_sirtalis	75.4	72	92.6	92.4	92.6	72.5	76.8	72.7	94.8	94.8	72	94.6	78.7	95.9	74.7	71.6	76.7	93	93.2	94.9	91.8	71.8	100	96.4	92.8
Thermophis_baileyi	76	72.3	94.3	94.1	94.3	72.8	77.1	72.9	96.4	96.4	72.2	96.4	79.1	97.5	74.9	71.8	77.5	94.8	95	96.7	92.6	72.2	96.4	100	94.5
Vipera_berus	76.4	71	97	96.7	96.8	71.4	76.4	71.5	93.4	93.4	71.1	93.4	79	94.5	74	70.6	77.8	97.6	97.8	93.5	91.3	70.9	92.8	94.5	100
Sequence percent identity matrixof Ihh
	Anolis_carolinensis	Crotalus_horridus	Crotalus_pyrrhus	Crotalus_viridis	Hydrophis_cyanocinctus	Hydrophis_hardwickii	Lacerta_bilineata	Lacerta_viridis	Notechis_scutatus	Ophisaurus_gracilis	Python_bivittatus	Protobothrops_flavoviridis	Pantherophis_guttatus	Protobothrops_mucrosquamatus	Paroedura_picta	Pseudonaja_textilis	Salvator_merianae	Thermophis_baileyi	Thamnophis_sirtalis	Vipera_berus
Anolis_carolinensis	100	82.5	82.5	82.4	81.6	81.6	86.2	86.2	81.6	80.7	84.1	82.9	81.8	83.3	83	81.8	85.9	82.8	82.5	82.1
Crotalus_horridus	82.5	100	99.3	99.1	93.9	93.8	85.3	85.3	94.4	78.4	93.6	97.9	94.6	98.1	82.6	94.4	85.7	95.5	94.4	96.8
Crotalus_pyrrhus	82.5	99.3	100	99.6	94	94	85.4	85.3	94.5	78.4	93.6	98.1	94.8	98.3	82.6	94.5	85.7	95.7	94.5	97
Crotalus_viridis	82.4	99.1	99.6	100	93.9	93.8	85.3	85.2	94.4	78.3	93.5	98	94.6	98.2	82.4	94.4	85.6	95.5	94.4	96.9
Hydrophis_cyanocinctus	81.6	93.9	94	93.9	100	99.7	85.1	84.9	98.6	78.1	92.5	94.3	95.2	94.4	81.6	98.5	85	96.4	94.8	94.2
Hydrophis_hardwickii	81.6	93.8	94	93.8	99.7	100	84.9	84.8	98.6	77.9	92.6	94.2	95.1	94.3	81.4	98.6	85	96.3	94.7	94.1
Lacerta_bilineata	86.2	85.3	85.4	85.3	85.1	84.9	100	99.8	84.8	82.2	86.9	85.7	85	86.2	84.8	85.2	90.3	86.1	85.2	85.5
Lacerta_viridis	86.2	85.3	85.3	85.2	84.9	84.8	99.8	100	84.7	82.1	86.7	85.7	84.8	86.2	84.6	85	90.2	85.9	85	85.4
Notechis_scutatus	81.6	94.4	94.5	94.4	98.6	98.6	84.8	84.7	100	78.1	92.9	94.8	95.5	95	81.2	99	85.1	97	95.3	94.4
Ophisaurus_gracilis	80.7	78.4	78.4	78.3	78.1	77.9	82.2	82.1	78.1	100	80	78.8	78.1	78.8	79.1	77.9	82.1	78.8	78.1	78.2
Python_bivittatus	84.1	93.6	93.6	93.5	92.5	92.6	86.9	86.7	92.9	80	100	94.2	93.1	94.2	83.3	93.1	87.4	94.4	93.4	93.8
Protobothrops_flavoviridis	82.9	97.9	98.1	98	94.3	94.2	85.7	85.7	94.8	78.8	94.2	100	95	98.9	83.2	94.9	86.2	96.1	94.9	97.2
Pantherophis_guttatus	81.8	94.6	94.8	94.6	95.2	95.1	85	84.8	95.5	78.1	93.1	95	100	95	81.4	95.5	85.1	97.6	96.1	95.1
Protobothrops_mucrosquamatus	83.3	98.1	98.3	98.2	94.4	94.3	86.2	86.2	95	78.8	94.2	98.9	95	100	83.3	95	86.5	96.1	95.2	97.3
Paroedura_picta	83	82.6	82.6	82.4	81.6	81.4	84.8	84.6	81.2	79.1	83.3	83.2	81.4	83.3	100	81.5	85.8	82.1	82.1	82.1
Pseudonaja_textilis	81.8	94.4	94.5	94.4	98.5	98.6	85.2	85	99	77.9	93.1	94.9	95.5	95	81.5	100	85.6	97	95.4	94.5
Salvator_merianae	85.9	85.7	85.7	85.6	85	85	90.3	90.2	85.1	82.1	87.4	86.2	85.1	86.5	85.8	85.6	100	86.2	85	85.7
Thermophis_baileyi	82.8	95.5	95.7	95.5	96.4	96.3	86.1	85.9	97	78.8	94.4	96.1	97.6	96.1	82.1	97	86.2	100	96.9	96.3
Thamnophis_sirtalis	82.5	94.4	94.5	94.4	94.8	94.7	85.2	85	95.3	78.1	93.4	94.9	96.1	95.2	82.1	95.4	85	96.9	100	94.9
Vipera_berus	82.1	96.8	97	96.9	94.2	94.1	85.5	85.4	94.4	78.2	93.8	97.2	95.1	97.3	82.1	94.5	85.7	96.3	94.9	100
	99.8	77.9
